1           **Molecular layer interneurons shape the spike activity of cerebellar Purkinje cells**  
2

3   Amanda M. Brown<sup>1,2,4\*</sup>, Marife Arancillo<sup>1,4\*</sup>, Tao Lin<sup>1,4</sup>, Daniel R. Catt<sup>1,4</sup>, Joy Zhou<sup>1,4</sup>, Elizabeth  
4    P. Lackey<sup>1,2,4</sup>, Trace L. Stay<sup>1,2,4</sup>, Zhongyuan Zuo<sup>1,4</sup>, Joshua J. White<sup>1,2,4</sup>, Roy V. Sillitoe<sup>1,2,3,4</sup>  
5

6           <sup>1</sup>Department of Pathology and Immunology and <sup>2</sup>Department of Neuroscience, <sup>3</sup>Program in  
7           Developmental Biology, Baylor College of Medicine, <sup>4</sup>Jan and Dan Duncan Neurological  
8           Research Institute of Texas Children's Hospital, 1250 Moursund Street, Suite 1325, Houston,  
9           Texas 77030, USA  
10

11  
12   Corresponding Author: Dr. Roy V. Sillitoe  
13    Tel: 832-824-8913  
14    Fax: 832-825-1251  
15    Email: [sillitoe@bcm.edu](mailto:sillitoe@bcm.edu)  
16

17    \*These authors contributed equally  
18

19    **One-sentence summary**

20    Cerebellar stellate cells and basket cells shape distinct Purkinje cell firing properties  
21

22    **Keywords**

23    Cerebellum, GABA, interneuron, development, Purkinje cell, *in vivo* electrophysiology  
24

25 **Abstract**

26 Purkinje cells receive synaptic input from several classes of interneurons. Here, we address the  
27 roles of inhibitory molecular layer interneurons in establishing Purkinje cell function *in vivo*.  
28 Using conditional genetics approaches in mice, we compare how the lack of stellate cell versus  
29 basket cell GABAergic neurotransmission sculpts the firing properties of Purkinje cells. We take  
30 advantage of an inducible *Ascl1<sup>CreER</sup>* allele to spatially and temporally target the deletion of the  
31 vesicular GABA transporter, *Vgat*, in developing neurons. Selective depletion of basket cell  
32 GABAergic neurotransmission increases the frequency of Purkinje cell simple spike firing and  
33 decreases the frequency of complex spike firing in adult behaving mice. In contrast, lack of  
34 stellate cell communication increases the regularity of Purkinje cell simple spike firing while  
35 increasing the frequency of complex spike firing. Our data uncover complementary roles for  
36 molecular layer interneurons in shaping the rate and pattern of Purkinje cell activity *in vivo*.

## 37 **Introduction**

38 The cerebellum is essential for diverse motor functions including coordination, learning, posture,  
39 and balance (Manto et al., 2012). Despite this functional diversity, a core cerebellar circuit  
40 mediates all of its functions (Eccles, 1967; Reeber et al., 2013). This canonical cerebellar circuit  
41 is comprised of relatively few types of cells (Voogd and Glickstein, 1998). The Purkinje cells,  
42 the sole output of the cerebellar cortex and main computational cell type, are located at the center  
43 of the circuit (**Figure 1A**). Purkinje cells receive input from several classes of interneurons. The  
44 granule cells project parallel fibers that send excitatory signals to Purkinje cells (Barbour, 1993;  
45 Eccles et al., 1966a, 1966b; Konnerth et al., 1990). However, in the posterior cerebellum, the  
46 unipolar brush cell interneurons can influence granule cell output by amplifying vestibular inputs  
47 that are delivered to the cerebellum by mossy fibers (Mugnaini et al., 2011). Golgi cells, another  
48 cell type of the granular layer, provide feedforward and feedback inhibitory signals onto granule  
49 cells (Cesana et al., 2013; Hull and Regehr, 2012). Purkinje cells also receive direct inhibitory  
50 inputs from basket cells that form pericellular baskets as well as specialized terminals known as  
51 pinceaux, and also from stellate cells that terminate on the smooth shafts of the Purkinje cell  
52 dendrites (Eccles et al., 1965; **Figure 1B-C**). Together, the interneurons play an essential role in  
53 controlling cerebellar cortical output during motor behavior (Barmack and Yakhnitsa, 2008).  
54 However, how each class of interneurons influences Purkinje cell firing is poorly understood.  
55 Here, we used inducible conditional genetic approaches in mice to test whether the two classes of  
56 cerebellar molecular layer interneurons have dedicated GABAergic functions *in vivo*.

57

58 Cerebellar interneurons come from distinct lineages and have specific birth dates (Machold and  
59 Fishell, 2005; Maricich and Herrup, 1999; Wang et al., 2005; Zhang and Goldman, 1996). Fate

60 mapping and transplant experiments demonstrated that the inhibitory interneurons are generated  
61 in a precise spatial and temporal manner such that the early born neurons occupy deep positions  
62 within the cerebellar cortex whereas later born neurons migrate to the more superficial locations  
63 (Altman and Bayer, 1997; Leto et al., 2009; Weisheit et al., 2006). More recent genetic inducible  
64 fate mapping experiments corroborated those results, and further suggested that the timing of  
65 *Ascl1* gene expression during differentiation may be used as a molecular time stamp for the birth  
66 of specific classes of GABAergic interneurons (Sudarov et al., 2011). *Ascl1*, also known as  
67 *Mash1*, is a basic helix-loop-helix transcription factor that is expressed during cerebellar  
68 development (Kim et al., 2008; Sudarov et al., 2011). In this study, we used the *Ascl1<sup>CreER</sup>*  
69 genetic fate-mapping allele (Sudarov et al., 2011) to not only mark interneurons, but also to  
70 constitutively silence their output. To do so, we selectively deleted a critical functional domain in  
71 the *Vgat* gene (Tong et al., 2008), which removed the ability of the inhibitory interneurons to  
72 signal their output using fast GABAergic neurotransmission. Genetic deletion using *Ascl1<sup>CreER</sup>*  
73 allowed us to independently target newly differentiated stellate and basket cell interneurons in  
74 the molecular layer because these neurons are born almost exclusively during the peri- to post-  
75 natal period when the cerebellar circuits are wiring up for function (White and Sillitoe, 2013b).  
76 This is advantageous for our study because *in vitro* studies showed that as development  
77 progresses, interneuron to Purkinje cell inhibition increases (Pouzat and Hestrin, 1997).  
78 Functional studies support these data since removing the interneurons or their postsynaptic  $\gamma 2$   
79 GABA(A) receptors obstruct motor learning (Sergaki et al., 2017; Wulff et al., 2009). Recent  
80 work also demonstrates that movement rate is dependent on coordinated molecular layer  
81 interneuron activity (Gaffield and Christie, 2017). Still, there is a long-standing debate as to  
82 whether stellate cells and basket cells are distinct types of interneurons (Schilling and Oberdick,

83 2009; Sultan and Bower, 1998), and more broadly whether they perform different functions in  
84 the cerebellar circuit (He et al., 2015). In this study, we genetically mark stellate cells and basket  
85 cells independently and manipulate their GABAergic neurotransmission as the cells are born to  
86 determine their impact on establishing the mature firing properties of Purkinje cells *in vivo*.

87

## 88 **Results**

### 89 **A mouse genetic strategy for marking and manipulating cerebellar GABA interneurons**

90 We aimed to manipulate neurotransmission in a way that would block the activity of the  
91 molecular layer interneurons without inducing changes in cerebellar morphology or causing  
92 neurodegeneration. We therefore targeted the function of the vesicular GABA transporter  
93 (VGAT), a transporter that is essential for the uptake of GABA into synaptic vesicles.  
94 Conditional knockout of *Vgat* in neurons does not induce widespread defects in cerebellar  
95 anatomy (White et al., 2014), making it an ideal target for genetic deletion. We targeted the  
96 removal of the *Vgat* gene in stellate cells and basket cells in the cerebellar cortex by using the  
97 *Mash1/Ascl1* promoter to drive tamoxifen-inducible Cre in the cerebellum (Sudarov et al., 2011;  
98 **Figure 1D**). The *Mash1/Ascl1* gene (referred to from here on as *Ascl1*) encodes a developmental  
99 transcription factor that is critical for the specification of neurons and glia (Kim et al., 2008). In  
100 the cerebellum, it is expressed in waves by neural and glial precursors as cells exit the cell cycle  
101 and begin to differentiate (Sudarov et al., 2011). The period of stellate cell differentiation begins  
102 at late embryonic stages and reaches peak levels at postnatal day (P) 3 - P5 whereas basket cell  
103 differentiation occurs during late embryogenesis and peaks at around embryonic day (E) 18  
104 (Sudarov et al., 2011). Therefore, to specifically target stellate cells we subcutaneously injected  
105 *Ascl1<sup>CreER</sup>;R26<sup>fx-stop-EYFP</sup>* postnatal pups with a single 20 mg/ml dose of tamoxifen at P4 (**Figure**  
106 **1E and G**), which would allow for recombination in *Ascl1* expressing cells for the next ~32  
107 hours (Zervas et al., 2004). But note that we predicted to label only subsets of interneurons since  
108 they are born over several days. Analysis of the GFP expression showed labeling of neurons in  
109 the upper two thirds of the molecular layer (**Figure 1G**). Morphological analysis of individual  
110 neurons that were marked by GFP confirmed their “stellate” appearance as well as their pattern

111 of axonal projections within the molecular layer (**Figure 1G and 2A**). We next confirmed  
112 whether we could target putative basket cells, as demonstrated previously using a different  
113 reporter (Sudarov et al., 2011). We targeted the reporter to neurons located in the basal one third  
114 of the molecular layer by delivering tamoxifen to E18.5 embryos by oral gavage of  
115 *Ascl1<sup>CreER</sup>;R26<sup>fx-stop-EYFP</sup>* pregnant dams (**Figure 1E and F**). The morphology of these neurons  
116 was consistent with their identity as basket cells, namely because of the presence of baskets on  
117 the Purkinje cell somata (**Figure 1F and 2A**). We could also track their prominent axons that  
118 travel in a transverse trajectory within the molecular layer, in close proximity to their targets, the  
119 Purkinje cell somata, which are located immediately below the axons (**Figure 1F and 2A**).

120

121 In addition to labeling what would be considered typical stellate cells and basket cells (**Figure**  
122 **2A**), we could also reveal neurons with structural variations, but likely belonging to these same  
123 classes. In the stellate cell marking scheme, cells with a more restricted dendritic span were  
124 observed in the very apical regions of the molecular layer (**Figure 2A**), and within the middle of  
125 the layer we could label cells with soma positions that mimicked basket cells (**Figure 2B**).  
126 Regardless of soma position, in the stellate cell marking scheme, the predominant loss of VGAT  
127 expression in the deletion allele was always in the more apical locations of the molecular layer  
128 (see **Figure 2H**). The basket cell marking scheme also labeled cells in the middle portion of the  
129 molecular layer, and these cells projected either ascending or descending processes (**Figure 2A**).  
130 Therefore, although the stellate cells and basket cells, defined strictly on position and density,  
131 could be separated using the *Ascl1<sup>CreER</sup>* lineage tracing, each class also contains cells with a  
132 varying range of specializations that are observed in their dendritic processes and axonal  
133 projections. Thus, neuronal position within the molecular layer alone is not necessarily indicative

134 of the identity of that interneuron, or the specific interneuron cell class that it belongs to.  
135 However, the cellular anatomy revealed by our genetic marking data are consistent with the  
136 results of classic Golgi staining of molecular layer interneurons (Palay and Chan-Palay, 1974).

137

### 138 **The *Ascl1<sup>CreER</sup>* allele has high specificity and recombination efficiency in interneurons**

139 We next tested whether we could confirm if the labeling of apical and basal molecular layer  
140 neurons reflect specifically stellate cell and basket cells, respectively. The reporter expressing  
141 cells colocalized with the expression of parvalbumin, which is a well-known marker for Purkinje  
142 cells and molecular layer interneurons (Stichel et al., 1986; **Figure 1F, 1G, and 2D**). We did not  
143 detect any GFP labeling in parvalbumin-immunoreactive Purkinje cells (**Figure 1F, 1G, and**  
144 **2D**), which is consistent with the earlier marking of Purkinje cells with *Ascl1<sup>CreER</sup>* between E10  
145 and E13 (Sudarov et al., 2011). The distribution of reporter expression in stellate versus basket  
146 cells was validated by RAR-related orphan receptor alpha ( $ROR\alpha$ ) expression (**Figure 2C**),  
147 which also marks molecular layer interneurons and Purkinje cells (Hamilton et al., 1996; Ino,  
148 2004; Maricich and Herrup, 1999; Sillitoe et al., 2009). An advantage of using  $ROR\alpha$  expression,  
149 a nuclear hormone receptor, is that the cytoplasmic GFP labeling in marked neurons pairs nicely  
150 with the robust staining of the nucleus. The adult stellate cells that were marked by giving pups  
151 tamoxifen at P4 expressed  $ROR\alpha$ , as did the adult basket cells that were marked at E18.5  
152 (**Figure 2C middle and right**). Similar to parvalbumin, when we used  $ROR\alpha$  expression as a  
153 marker we did not detect GFP in Purkinje cells (**Figure 2C middle and right**). Moreover, we  
154 did not detect GFP expression in any of the granular layer interneurons (**Figure 2C middle and**  
155 **right**). We conclude that our *Ascl1<sup>CreER</sup>* genetic marking schemes are selective for the classes of  
156 inhibitory interneurons that reside within the molecular layer. With consideration of these



157 classes' date of differentiation, morphology, layer location, and protein expression profile, for  
158 the remaining duration of this text, the cells that are marked using the E18.5 and P4 induction  
159 time points will be referred to as “basket cells” and “stellate cells,” respectively.

160

161 The efficiency of *Ascl1<sup>CreER</sup>* recombination on the *R26<sup>fx-stop-EYFP</sup>* reporter allele provides a  
162 prediction for the percentage of interneurons that can be manipulated with this genetic paradigm.

163 It was essential to know how widespread and reliable the cell marking strategy is before crossing

164 the *Ascl1<sup>CreER</sup>* line to a functional allele such as *Vgat<sup>fx/fx</sup>* for testing circuit function. We

165 quantitatively examined the number of parvalbumin-expressing molecular layer interneurons that

166 also express GFP reporter in *Ascl1<sup>CreER</sup>;R26<sup>fx-stop-EYFP</sup>* mice (**Figure 2D**). The recombination

167 observed in the totality of the molecular layer in the stellate cell marking scheme is  $35.69\% \pm$

168  $4.458\%$  with the vast majority of labeled cells observed in the apical molecular layer (**Figure 2E,**

169 **see 1G and 2C right;  $n=2$  sections from 3 animals each**). Similarly, the recombination observed

170 in the totality of the molecular layer in the basket cell scheme is  $34.26\% \pm 1.316\%$  with the

171 majority of labeled cells located in the basal and middle molecular layer (**Figure 2E, see 1F and**

172 **2C middle;  $n=3$  sections from 3 animals each**). This percent recombination marked enough

173 putative basket cells to project axons that form baskets on almost every Purkinje cell in the field

174 of view, on any given tissue section (**Figure 1F, 2C middle**). Importantly, we were successful in

175 manipulating a similar number of cells in both conditions while avoiding unwanted

176 recombination throughout the entire molecular layer, which was required for targeting each class

177 of interneurons. This marking is ideal for distinguishing the relative distributions of neuron that

178 contribute to the molecular layer populations. Additionally, in both genetic marking paradigms,

179 we could detect GFP reporter expression in all lobules of the cerebellum, and we were able to

180 mark neurons in the vermis, paravermis, and also in the hemispheres (**Figure 2F-G**). Therefore,  
181 we did not find systematic regional biases in the localization of interneuron populations that were  
182 targeted by our genetic marking paradigms.

183

#### 184 **Targeted loss of VGAT protein in conditional *Ascl1*<sup>CreER/+</sup>; *Vgat*<sup>fx/fx</sup> mutant mice**

185 We set up crosses to generate litters with genotype *Ascl1*<sup>CreER/+</sup>; *R26*<sup>fx-stop-EYFP</sup>; *Vgat*<sup>+/+</sup> (control)  
186 and genotype *Ascl1*<sup>CreER/+</sup>; *R26*<sup>fx-stop-EYFP</sup>; *Vgat*<sup>fx/fx</sup> (mutant). This approach allows us to mark and  
187 manipulate the same neurons *in vivo*. After tamoxifen treatment at P4, we expected to mark and  
188 manipulate stellate cells in the mutants and only mark cells in the control. We expected a similar  
189 manipulation for basket cells after providing tamoxifen at E18.5. To test whether VGAT was  
190 removed from the intended neurons we quantified the number and distribution of VGAT-positive  
191 synaptic terminals in the molecular layer. VGAT expression in the molecular layer of control  
192 mice showed an approximately uniform distribution of punctae from the basal to the apical  
193 regions (**Figure 2H**). Stellate cells, basket cells, and Purkinje cell axon collaterals are the main  
194 contributors to the GABAergic synapses marked by VGAT expression in the molecular layer.  
195 We found that the density of VGAT punctae in the stellate cell mutant mice was significantly  
196 reduced, specifically in the apical region of the molecular layer (**Figure 2H and 2I**; mean VGAT  
197 density as percent of control: apical = 36.26% ± 3.621,  $P = 0.0249$ ; middle = 49.08% ± 8.957,  $P$   
198 = 0.0740; basal = 76.63% ± 17.23,  $P = 0.4320$ ). In contrast, after deleting *Vgat* in basket cells,  
199 we found significantly reduced expression of VGAT in the basal portion of the molecular layer,  
200 but we also found a marked reduction, albeit less pronounced, in the middle and apical regions  
201 (**Figure 2H and 2I**; mean VGAT density as percent of control: apical = 57.69 % ± 8.799,  $P =$   
202 0.0976; middle = 43.33% ± 9.317,  $P = 0.0451$ ; basal = 42.62% ± 8.560,  $P = 0.0315$ ). Loss of

203 basal VGAT expression is due to manipulation of the baskets and pinceaux whereas loss of  
204 VGAT apically is due to manipulation of basket cell synapses made by the ascending collateral  
205 axons (Palay and Chan-Palay, 1974; **Figure 2H**, see **2A and 1B**). Interestingly, total VGAT  
206 expression in the molecular layer was not significantly different between the basket cell and  
207 stellate cell manipulations (**Figure 2J**; basket cell mean VGAT density as percent of control =  
208  $47.95 \pm 7.962$ ; stellate mean VGAT density as percent of control =  $54.03 \pm 8.703$ ;  $P = 0.6336$ ).  
209 These data confirm that genetic deletion of *Vgat* with *Ascl1*<sup>CreER</sup> is effective for manipulating  
210 VGAT protein. The data also show that the *Ascl1*<sup>CreER</sup> allele can be used for region-specific  
211 deletion of VGAT in a cerebellar layer where classes of related neurons are co-residing.

212

### 213 **Deletion of *Vgat* does not prevent interneurons from occupying the molecular layer**

214 Deletion of *Vgat* could result in a loss of VGAT because the protein is depleted or because cells  
215 are lost. Indeed deletion of genes encoding for molecules involved in neurotransmission can  
216 result in cerebellar cell death, especially when these molecules are expressed during  
217 development (McFarland et al., 2007; Sawada et al., 2009; Slemmer et al., 2005). To test this  
218 possibility, we again stained for the nuclear hormone receptor, ROR $\alpha$ , to visualize interneuron  
219 distribution in lobule III or IV. Lobules III and IV are ideal for systematically examining  
220 molecular layer anatomy because the deep fissures provide long, straight regions of cortex that  
221 allow consistent measures for analysis. We found that the density of molecular layer interneurons  
222 that express ROR $\alpha$  in both the stellate cell and basket cell mutants (**Figure 2C**; stellate cells –  
223 control =  $1.215 \times 10^{-4}$  cells/ $\mu\text{m}^3 \pm 3.604 \times 10^{-5}$ , N = 3, n = 3; mutant =  $1.168 \times 10^{-4}$  cells/ $\mu\text{m}^3 \pm 1.711$   
224  $\times 10^{-5}$ ;  $P = 0.9135$ , N = 3, n = 3; basket cells – control =  $1.141 \times 10^{-4}$  cells/ $\mu\text{m}^3 \pm 1.137 \times 10^{-5}$ , N =  
225 3, n = 3; mutant =  $9.559 \times 10^{-5}$  cells/ $\mu\text{m}^3 \pm 2.210 \times 10^{-5}$ , N = 3, n = 3;  $P = 0.5098$ ) was not

226 significantly different from controls. Therefore, loss of VGAT does not kill the interneurons.

227

### 228 **Loss of *Vgat* in newly differentiated interneurons causes Purkinje cell firing defects**

229 To test for electrophysiology defects we analyzed *Ascl1*<sup>CreER/+</sup>; *R26*<sup>fx-stop-EYFP</sup>; *Vgat*<sup>+/+</sup> (control)

230 and *Ascl1*<sup>CreER/+</sup>; *R26*<sup>fx-stop-EYFP</sup>; *Vgat*<sup>fx/fx</sup> mice (mutant). However, *Ascl1*<sup>CreER/+</sup>; *Vgat*<sup>fx/fx</sup> mutants

231 without the marking allele were also used for analysis. We performed extracellular single-unit

232 recordings with tungsten electrodes. To access the cerebellum, a craniotomy and recording port

233 were positioned over lobule VI of the vermis (**Figure 3A**; White et al., 2016a). Alert adult mice

234 were allowed to stand on a wheel during recordings (**Figure 3B**). Although the mice are free to

235 walk on the wheel, the periods of most stable recordings that were used to quantify the Purkinje

236 cell responses were acquired when the mice were sitting at rest. Purkinje cells were recorded at a

237 depth of 0 – 2 mm from the surface of the cerebellum and were identified by their characteristic

238 complex spikes (**Figure 3C**). To examine the firing properties of Purkinje cells, we measured

239 both the firing frequency and the variability of the firing pattern in alert mice for both simple

240 spike and complex spike activity. Firing frequency was measured as the mean number of spikes

241 over time, and indicates the level of activity of a cell. The variability of the firing pattern was

242 measured using two parameters: the coefficient of variance (CV), which measures the variability

243 in firing intervals over the entire recording session, and CV2, which measures the variability of

244 firing intervals between two adjacent spikes (Holt et al., 1996). Loss of stellate cell GABAergic

245 neurotransmission increases the regularity of Purkinje cell simple spike firing as measured by

246 CV2 (**Figure 3G**; control =  $0.5186 \pm 0.01968$ ; N = 7, n = 20; mutant =  $0.4091 \pm 0.01220$ ; N = 3,

247 n = 15;  $P < 0.0001$ ). However, we did not detect a significant change in CV (**Figure 3F**; control

248 =  $0.5787 \pm 0.0264$ ; N = 7, n = 20; mutant =  $0.5333 \pm 0.03603$ ; N = 3, n = 15;  $P = 0.3181$ ) or the

249 firing rate (**Figure 3E**; control =  $74.99\text{Hz} \pm 6.031\text{Hz}$ ;  $N = 7$ ,  $n = 20$ ; mutant =  $76.85\text{Hz} \pm$   
250  $8.298\text{Hz}$ ;  $N = 3$ ,  $n = 15$ ;  $P = 0.8577$ ). Interestingly, loss of basket cell GABAergic  
251 neurotransmission resulted in an increase in the frequency of Purkinje cell simple spike firing  
252 (**Figure 3M**; control =  $64.56\text{Hz} \pm 4.615\text{Hz}$ ;  $N = 5$ ,  $n = 17$ ; mutant =  $84.76\text{Hz} \pm 5.670\text{Hz}$ ;  $N = 3$ ,  
253  $n = 18$ ;  $P = 0.0094$ ). There was no significant change in CV (**Figure 3N**; control =  $0.5996 \pm$   
254  $0.03410$ ;  $N = 5$ ,  $n = 17$ ; mutant =  $0.5611 \pm 0.03852$ ;  $N = 3$ ,  $n = 18$ ;  $P = 0.4599$ ) or CV2 (**Figure**  
255 **3O**; control =  $0.5223 \pm 0.02673$ ;  $N = 5$ ,  $n = 17$ ; mutant =  $0.4688 \pm 0.03437$ ;  $P = 0.2282$ ).  
256 Further, there was a divergent effect of the lack of stellate and basket cell GABAergic  
257 neurotransmission on complex spike activity. Lack of stellate cell neurotransmission increases  
258 the complex spike firing rate (**Figure 3I**; control =  $1.186\text{Hz} \pm 0.06845\text{Hz}$ ;  $N = 7$ ,  $n = 20$ ; mutant  
259 =  $1.469\text{Hz} \pm 0.08279\text{Hz}$ ;  $N = 3$ ,  $n = 15$ ;  $P = 0.0131$ ). This occurs without a significant change in  
260 CV (**Figure 3J**; control =  $0.8412 \pm 0.03723$ ;  $N = 7$ ,  $n = 20$ ; mutant =  $0.7650 \pm 0.02704$ ;  $N = 3$ ,  $n$   
261 =  $15$ ;  $P = 0.1076$ ) or CV2 (**Figure 3K**; control =  $0.8819 \pm 0.02203$ ;  $N = 7$ ,  $n = 20$ ; mutant =  
262  $0.8456 \pm 0.01697$ ;  $N = 3$ ,  $n = 15$ ;  $P = 0.2006$ ). However, the lack of basket cell  
263 neurotransmission decreases the complex spike firing rate (**Figure 3Q**; control =  $1.538\text{Hz} \pm$   
264  $0.07298\text{Hz}$ ;  $N = 5$ ,  $n = 17$ ; mutant =  $1.148\text{Hz} \pm 0.03695\text{Hz}$ ;  $N = 3$ ,  $n = 18$ ;  $P < 0.0001$ ). This also  
265 occurs without a significant change in CV (**Figure 3R**; control =  $0.7074 \pm 0.01833$ ;  $N = 5$ ,  $n =$   
266  $17$ ; mutant =  $0.7342 \pm 0.01970$ ;  $N = 3$ ,  $n = 18$ ;  $P = 0.3252$ ) or CV2 (**Figure 3S**; control =  $0.8533$   
267  $\pm 0.01476$ ;  $N = 5$ ,  $n = 17$ ; mutant =  $0.8552 \pm 0.02171$ ;  $N = 3$ ,  $n = 18$ ;  $P = 0.9414$ ). These data  
268 suggest that stellate cell and basket cell GABAergic output activity cooperate to establish the  
269 proper rate and pattern of simple spike and complex spike firing of Purkinje cells *in vivo*.

270

271 **Loss of molecular layer interneuron inhibition does not cause neurodegeneration**

272 We wondered whether removing GABAergic neurotransmission from molecular layer  
273 interneurons altered Purkinje cell function because of neurodegeneration in the cerebellum. This  
274 was important to test because dysgenesis during development and neurodegeneration in the adult  
275 are known to drive a number of electrophysiological abnormalities (Reeber et al., 2013).  
276 Specifically, alterations of the Purkinje cell dendrites after loss of interneuron connectivity  
277 would be a primary concern in our paradigm. We therefore measured molecular layer thickness  
278 as a proxy for dendrite span. Molecular layer thickness is a sensitive and straightforward  
279 measure for developmental and adult-associated defects that disrupt Purkinje cell dendrite size  
280 (Hansen et al., 2013; White and Sillitoe, 2017; White et al., 2014, 2016b). We stained sagittal cut  
281 tissue sections of the cerebellum with either anti-calbindin or anti-CAR8 antibody, which mark  
282 Purkinje cells, and a fluorescent Nissl stain or DAPI, which outline all layers but heavily mark  
283 the granular layer because of the high cell density (**Figure 4A-B**). Molecular layer thickness was  
284 assessed for lobule III/IV by measuring the perpendicular distance from the molecular layer-  
285 facing edge of a Purkinje cell soma to the outer edge of the molecular layer. We found that  
286 molecular layer thickness was not altered in either of the mutant mice compared to controls  
287 (**Figure 4C**; stellate cells – control =  $159.7\mu\text{m} \pm 9.201$ ; mutant =  $157.2\mu\text{m} \pm 5.493$ ;  $P = 0.8288$ ;  
288 basket cells – control =  $179.9\mu\text{m} \pm 3.833$ ; mutant =  $181.1\mu\text{m} \pm 3.164$ ;  $P = 0.8200$ ). These data  
289 indicate that the outgrowth of the Purkinje cell dendritic tree during postnatal development, and  
290 its maintenance thereafter, were not adversely affected after we genetically silenced stellate cell  
291 and basket cell GABAergic output activity in the developing cerebellar cortex.

292

### 293 **Deleting *Vgat* in interneurons does not alter their targeting onto Purkinje cells**

294 We next wanted to determine whether interneurons that lack *Vgat* are targeted to the correct

295 regions of the Purkinje cell. We therefore examined whether the ultrastructure of synapses in the  
296 molecular layer was intact. To do so, we performed electron microscopy on sagittal sections cut  
297 through the adult cerebellum. Using the distinctively large soma of Purkinje cells as a reference  
298 point for where the molecular layer starts, we assessed the integrity of inhibitory synapses in the  
299 Purkinje cell layer and molecular layer. Stellate cells terminate on the shaft of the Purkinje cell  
300 dendritic tree (Palay and Chan-Palay, 1974). Excitatory synapses are distinguished from  
301 inhibitory synapses by the presence or absence, respectively, of a postsynaptic density that gives  
302 excitatory synapses an asymmetric appearance (Palay and Chan-Palay, 1974). We observed  
303 synapses with symmetric morphologies that form postsynaptic terminals on the Purkinje cell  
304 dendrites in the molecular layer (**Figure 4D-E**). These findings indicate that inhibitory synapses  
305 are retained in their correct positions within the cerebellar cortex despite the conditional  
306 silencing of stellate cell interneuron synapses. We performed a similar analysis in mice with  
307 silenced basket cell output. The axons of several basket cells converge on single Purkinje cell  
308 somata to form the basket (Palay and Chan-Palay, 1974). Basket cell axons extend further to  
309 form specialized pinceaux synapses around the axon initial segments of Purkinje cells (Ango et  
310 al., 2004; Palay and Chan-Palay, 1974; Sotelo, 2008). We found inhibitory synapses on the  
311 Purkinje cell somata (**Figure 4F-G**). Importantly, the interneuron synapses in the stellate cell and  
312 basket cell mutants contain distinct vesicles. This result indicates that despite the deletion of  
313 *Vgat* and the loss of GABAergic neurotransmission, the synaptic structural machinery that is  
314 required for housing neurotransmitters before release, remains intact (**Figure 4D-G**).

315

316 To complement the electron microscopy studies in which we assessed presynaptic components,  
317 we also tested the correct distribution of the postsynaptic structures belonging to the inhibitory

318 synapses by immunohistochemical staining and light microscopy. Gephyrin is expressed in the  
319 postsynaptic compartment of inhibitory synapses (Sassoè-Pognetto et al., 1999). In *Ascl1<sup>CreER/+</sup>*;  
320 *R26<sup>fx-stop-EYFP</sup>*; *Vgat<sup>fx/fx</sup>* mutant mice treated with tamoxifen at P4, triple staining with gephyrin,  
321 VGAT, and GFP revealed a normal distribution of gephyrin in GFP-rich molecular layer regions  
322 that were devoid of VGAT expression (**Figure 4H-M**). After silencing basket cells by giving  
323 tamoxifen at E18.5 to *Ascl1<sup>CreER/+</sup>*; *Vgat<sup>fx/fx</sup>* mutants, we found that HCN1 (hyperpolarization-  
324 activated cyclic nucleotide-gated channel), which is expressed at both the pre-and post-synaptic  
325 sites at basket cell to Purkinje cell connections (Luján et al., 2005), had a normal expression  
326 profile around the Purkinje cell layer (**Figure 4N-O**). Moreover, we used AnkG (ankyrin-G)  
327 expression to show the presence of Purkinje cell axon initial segments after the loss of basket cell  
328 inhibitory neurotransmission in *Ascl1<sup>CreER/+</sup>*; *Vgat<sup>fx/fx</sup>* mutant mice (**Figure 4P-S**; Buttermore et  
329 al., 2012). We also sought to determine whether other major cell types of the cerebellar cortex  
330 were present as normal, since abnormal Purkinje cell activity may affect the gross organization  
331 of cerebellar circuitry. Purkinje cells, granule cells, Golgi cells, parallel fibers, mossy fibers,  
332 climbing fibers, and unipolar brush cells were all present with similar location and morphology  
333 in both the basket and stellate cell *Vgat* mutants as compared to control cerebella (**Figure 5**).  
334 Finally, we sought to determine which *Ascl1* lineage cells had been manipulated outside of the  
335 cerebellum at both time points to determine whether it was likely the deletion of *Vgat* from these  
336 cells could result in the alterations in Purkinje cell firing that were found. Similar to previous  
337 work (Kim et al., 2008), we found the majority of *Ascl1* lineage extracerebellar cells  
338 differentiating at both our basket and stellate time points are oligodendrocytes and olfactory bulb  
339 neurons (**Figure 6**). We therefore predicted that in our *Vgat* deletion paradigms, relatively few  
340 cells would have been manipulated outside of the cerebellum (**Figure 6A & H**). Specifically,



341 based on reporter expression we found that the majority of extracerebellar cells outside the  
342 olfactory bulb had a glial-like morphology (**Figure 6B-G, I-N**). These putative glial cells were  
343 co-labeled with carbonic anhydrase II (CAII), suggesting their identity as oligodendrocytes  
344 (**Figure 6O**). The extracerebellar cells with a more neuron-like morphology included very sparse  
345 putative granule cells in the hippocampus that were detected only in the stellate cell marking  
346 scheme (**Figure 6K**) and olfactory bulb neurons that were detected in both the stellate and basket  
347 cell marking schemes (**Figure 6G**). The identity of these cells as neurons was confirmed by the  
348 co-labeling of GFP reporter and NeuN (**Figure 6P-Q**). The vast majority of the non-glial  
349 extracerebellar cells were found in the olfactory bulb. These results indicate that the  
350 extracerebellar deletion of *Vgat* occurred in a population consisting largely of oligodendrocytes  
351 and olfactory bulb neurons, a population of neurons from which the deletion of *Vgat* gene  
352 function would be highly unlikely to have significant effects on cerebellar Purkinje cell activity.  
353

354 **Discussion**

355 The cerebellum has served as the structure of choice in thousands of developmental, anatomical,  
356 functional, and behavioral studies. Among the reasons for its popularity are that its main cell  
357 types were identified more than a century ago (Ramón y Cajal, 1909), and electrophysiological  
358 methods have allowed a detailed understanding of its connections (Eccles et al., 1976). However,  
359 it is still unclear how connectivity within the different classes of interneurons influences  
360 cerebellar cortical function. This study is focused on understanding whether the molecular layer  
361 interneurons have distinct inhibitory impacts on their target Purkinje cells. We tested how stellate  
362 cell and basket cell GABAergic neurotransmission influences Purkinje cell activity. To address  
363 this problem, we devised a genetic approach in which we used an *Ascl1<sup>CreER</sup>* mouse line to delete  
364 the *Vgat* gene in the developing cerebellum. The *Ascl1<sup>CreER</sup>* allele provided an opportunity for  
365 spatial and temporal manipulation of stellate cells independently from basket cells (Sudarov et  
366 al., 2011). We found that loss of *Vgat* in stellate cells altered the pattern of Purkinje cell simple  
367 spike firing and the rate of complex spike firing in alert mice, whereas deleting *Vgat* in basket  
368 cells changed the rate of both Purkinje cell simple spike and complex spike firing. The data  
369 suggest that molecular layer interneurons cooperate to establish Purkinje cell function *in vivo*.

370

371 **Are cerebellar stellate cells and basket cells distinct cell types?**

372 Traditional high-resolution anatomy distinguishes molecular layer inhibitory interneurons based  
373 on multiple cellular, sub-cellular, and connectivity features (Palay and Chan-Palay, 1974). Still,  
374 even using these various features it can be difficult to unambiguously assign neurons to a  
375 specific stellate or basket cell identity. Golgi staining analysis later suggested that classification  
376 based on distinct groups is challenging at best, since a more gradual and continuous identity

377 could better reflect the molecular layer composition (Sultan and Bower, 1998). Analysis of gene  
378 expression yet again challenged the view, as the differential expression of multiple genes  
379 indicates at least some level of specificity and potentially unique identities within the  
380 interneurons (Schilling and Oberdick, 2009). Despite the differential expression, the authors also  
381 argue for a common origin. Indeed, stellate cells and baskets arise from a common precursor  
382 pool in the ventricular zone (Hoshino et al., 2005), and they are generated in waves during  
383 embryonic through postnatal development (Leto et al., 2009; Sudarov et al., 2011). These  
384 different perspectives are further complicated by the observation that even though the somata are  
385 located in distinct positions within the dorsal-ventral axis of the molecular layer, there is some  
386 spread of both cell types' somata into the middle molecular layer and a fuzzy separation of  
387 synaptic location (**Figure 2B and 2G**). Regardless of anatomical or molecular distinctness, we  
388 asked whether any of these properties impact their contribution to cerebellar function. There is  
389 consensus that stellate cells and basket cells both synapse directly onto Purkinje cells (Palay and  
390 Chan-Palay, 1974). But, do they influence Purkinje cells in a similar or different manner? To  
391 tackle this question, we used an *in vivo* genetic model in which fast GABAergic  
392 neurotransmission is blocked without causing neurodegeneration or overt circuit rearrangements  
393 that would, if present, alter Purkinje cell function. Genetic deletion of VGAT, in general, does  
394 not impair the development of inhibitory synapses (Wojcik et al., 2006). Nor does it alter the  
395 gross morphology or the basic structure of cerebellar circuits (White et al., 2014). Our results  
396 uncover that stellate cells and basket cells do have distinct functional interactions with their  
397 Purkinje cell targets, with stellate silencing influencing Purkinje cell simple spike pattern and  
398 complex spike rate (**Figure 3G and 3I**) and basket cell silencing altering the rate of both simple  
399 and complex spikes (**Figure 3N and 3Q**). However, our data cannot exclude the possibility that

400 both cell types modulate multiple aspects of Purkinje cell function, even though each one might  
401 have a preferred interaction for modulating rate compared to pattern. In other words, there is  
402 likely no one molecular layer inhibitory cell type dedicated exclusively for control of rate and  
403 pattern. In slice, inhibitory activity was shown to control the regularity of interneuron firing  
404 (Häusser and Clark, 1997), and in a specific form of inhibitory rebound plasticity, basket cells  
405 were shown to control the pattern and rate of Purkinje cell output (He et al., 2015). It would be  
406 interesting if basket cells and stellate cells are co-opted for rate versus pattern modulation  
407 depending on the specific behavioral task or the specific changes in plasticity that arise. Indeed,  
408 based on our current data recorded *in vivo*, we can speculate that the predominant roles of the  
409 two classes of interneuron might be strengthened by network activity at the population level.  
410 Given the developmental nature of our manipulation, it is also possible the consequences we  
411 observed on Purkinje cell firing are due, at least in part, to compensatory or plasticity  
412 mechanisms after *Vgat* deletion. Even if this were the case, it is still intriguing that Purkinje cell  
413 rate is refractory to loss of stellate cell input whereas pattern is refractory to basket cell input.

414

415 **Connectivity within molecular layer interneurons might be organized in a manner that**  
416 **harnesses their unique developmental properties, wiring diagrams, and functional roles**

417 Stellate cells and basket cells do not function in isolation, and interactions within each cell type  
418 are not entirely random. Rather, the electrical and chemical connectivity in molecular layer  
419 interneuron populations are both highly structured, with connectivity clustering coefficients that  
420 reflect a spatial arrangement in the sagittal plane (Rieubland et al., 2014). This architecture is  
421 intriguing because the entire cerebellum is organized around a map of sagittal compartments  
422 (Apps and Hawkes, 2009; Cerminara et al., 2015). With specific importance to molecular layer

423 interneuron circuitry, it is the Purkinje cells that determine all aspects of cerebellar sagittal  
424 organization. Purkinje cells are organized into a complex but precisely pleated array of sagittal  
425 compartments that are defined by cellular birth dates, lineage, gene expression, afferent  
426 connectivity, and neuronal firing properties (Cerminara et al., 2015; White and Sillitoe, 2013b).  
427 Purkinje cells cues during development establish the fundamental map (Crocì et al., 2006;  
428 Sillitoe et al., 2008a) whereas Purkinje cells activity fine-tunes the topography into functional  
429 modules (White et al., 2014). Molecular markers link subsets of interneurons to specific Purkinje  
430 cells forming zones defined by common expression (Chan-Palay et al., 1982). There is also some  
431 evidence that the inhibitory neurons follow the expression of zebrinII (Sillitoe et al., 2008b), the  
432 most extensively studied molecular marker of Purkinje cell zones (Brochu et al., 1990; Sillitoe  
433 and Hawkes, 2002). Based on the *Ascl1<sup>CreER</sup>* marking schemes for stellate cells and basket cells,  
434 there is no reason to believe that either paradigm marked cells that were restricted to particular  
435 zonal compartments (**Figure 2F-G**), although it is possible that an interneuron's birth date  
436 determines the particular zonal circuit that it will eventually wire into.

437  
438 Deletion of *Vgat* using *Ascl1<sup>CreER</sup>* was predicted to leave signaling intact in a substantial number  
439 of cells. By design, only subpopulations of molecular layer interneurons were targeted, resulting  
440 in total molecular layer recombination of ~35% for each scheme (**Figure 2E**) with the majority  
441 of labeled cells found in their canonical regions of the molecular layer (**Figure 1F-G**). Still,  
442 VGAT was not entirely eliminated, but was instead reduced by ~57% in the basal molecular  
443 layer and ~64% in the apical molecular in the basket and stellate schemes, respectively (**Figure**  
444 **2I-J**). This efficiency is impressive for only a single dose of tamoxifen given that the molecular  
445 layer interneurons are born progressively over several embryonic and postnatal days. Still, even

446 by creating a mosaic population of silenced interneurons we detected significant deficits in the  
447 overall function of Purkinje cells regardless of which particular cerebellar zone the recorded cell  
448 resided within (Xiao et al., 2014; Zhou et al., 2014). Part of the reliability in producing Purkinje  
449 cells firing defects could be due to the connectivity of each manipulated interneuron, given that  
450 each one has the potential to make synaptic contacts with multiple Purkinje cells (Palay and  
451 Chan-Palay, 1974). While stellate cells make mainly local synaptic connections with potentially  
452 fewer long-distance contacts, the basket cells could contact upwards of 9 Purkinje cells each  
453 (Palkovits et al., 1971). The establishment of these distributions could also be altered in our  
454 genetic deletion paradigms. During development, synaptic activity controls the speed and  
455 direction of migration (Wefers et al., 2017). Because stellate cells and basket cells have intra-  
456 and inter-cellular connections with one another (Palay and Chan-Palay, 1974), loss of  
457 GABAergic neurotransmission could impede neuronal migration. We suspect that if there were  
458 such deficits, they would likely be subtle or highly localized and specific since we did not detect  
459 obvious changes in cerebellar cell distribution by immunohistochemistry (**Figure 2C, 4A-B, 5A-**  
460 **X**) or afferent targeting as determined by electron microscopy (**Figure 4D-G**).

461

### 462 **Implications of interneuron connectivity on cerebellar circuit function**

463 Despite a long and rich history of understanding cerebellar cellular composition, circuitry, and  
464 function (Eccles, 1967; Ramón y Cajal, 1909; Voogd, 2014; Voogd and Glickstein, 1998), the  
465 last decade of cerebellar research has uncovered a number of additional cerebellar cortical  
466 afferent and efferent connections that could influence molecular layer interneuron processing.  
467 Purkinje cells not only contact the cerebellar nuclei, but through collaterals they also contact  
468 each other (Díaz-Rojas et al., 2015; Orduz and Llano, 2007; Orduz et al., 2014; Watt et al., 2009;

469 Witter et al., 2016), interneurons (Witter et al., 2016), and granule cells (Guo et al., 2016). The  
470 cerebellar nuclei indeed project out of the cerebellum, but they too also project back to the  
471 cerebellar cortex by way of inhibitory processes to Golgi cells and excitatory processes to Golgi  
472 cells (Ankri et al., 2015) and granule cells (Gao et al., 2016; Houck and Person, 2015). In this  
473 context, we should consider the various possible inputs to the molecular layer interneurons:  
474 climbing fibers to stellate cells and basket cells, Purkinje cells to stellate and basket cells,  
475 granule cells to stellate and basket cells, stellate cells to basket cells, basket cells to stellate cells,  
476 basket cells to basket cells, and stellate cells to stellate cells (Palay and Chan-Palay, 1974; Witter  
477 et al., 2016). Before each interneuron communicates its output to its respective Purkinje cells, we  
478 also take into account that electrical connections tether rodent basket cells into groups of 5 and  
479 stellate cells in pairs (Alcami and Marty, 2013). Moreover, the interaction between small patches  
480 of granule cells and Purkinje cells is shaped by molecular layer interneurons, and the strength of  
481 this inter-layer communication is dependent on relative position to the Purkinje cells in the  
482 sagittal and mediolateral axis (Dizon and Khodakhah, 2011). It should also be considered that  
483 although the molecular layer interneurons are defined as GABAergic, they exhibit the expected  
484 inhibitory drive as well as a less appreciated excitatory influence (Chavas and Marty, 2003).  
485 Specifically, for our stellate cell silencing paradigm, it could be that the lack of a change in  
486 simple spike rate indicates an equilibrium rather than the absence of an effect. The predicted  
487 increase in Purkinje cell firing rate after loss of inhibitory GABA function would be countered  
488 by decrease in Purkinje cell spikes after removing excitatory GABA function (**Figure 3**). Under  
489 normal physiological conditions, such an effect could have a modulatory role in finely  
490 controlling Purkinje cell spike output, especially when dynamic changes are required during  
491 unrestricted behavior (Sauerbrei et al., 2015). The impact of interneuron communication perhaps

492 could also be appreciated at the population level. It could be that the local electrical networking  
493 together with their arrangement into rows facilitates a topographic interaction with zonally  
494 projecting climbing fibers from the inferior olive (Lang et al., 2017; Sugihara et al., 2009). At the  
495 level of Purkinje cells, this ordered cellular and circuit architecture could manifest as  
496 synchronous activity (Lang et al., 2014). Synchrony between chemically linked molecular layer  
497 interneurons has been reported (Rieubland et al., 2014) and their impact is likely restricted to  
498 sagittal bands (Mann-Metzer and Yarom, 1999). This is consistent with the long-standing  
499 hypothesis that synchronous neural activity promotes a level of neuronal ensemble dynamics that  
500 allow for muscles synergies to accommodate complex motor behaviors (Welsh et al., 1995).

501

## 502 **Conclusions**

503 Cerebellar stellate cells and basket cells are the predominant cell type of the molecular layer.  
504 They arise from a common progenitor pool in the ventricular zone of the cerebellum and  
505 continue to divide and differentiate through postnatal development. We used an *Ascl1*<sup>CreER</sup>  
506 genetic inducible allele to leverage this spatial and temporal pattern of development in order to  
507 manipulate the synaptic output of inhibitory interneurons. By blocking *Vgat* expression and then  
508 recording Purkinje cell activity in alert adult mice we uncovered that stellate cells establish the  
509 Purkinje cell simple spike firing pattern whereas basket cells determine their rate. Additionally,  
510 we found that Purkinje cell complex spike firing rate increases with a lack of stellate cell  
511 inhibition but in contrast decreases with a lack of basket cell inhibition. This study establishes  
512 complementary roles for the GABAergic function of cerebellar molecular layer interneurons.



## 513 **Materials and Methods**

514 *Mouse Lines.* All experiments were performed according to a protocol approved by the  
515 Institutional Animal Care and Use Committee (IACUC) of Baylor College of Medicine. Three  
516 mouse lines were intercrossed to generate the various alleles. The first line expresses a knock-in  
517 construct of the *CreER<sup>T2</sup>* allele under the control of the *Ascl1* promoter (*Ascl1<sup>CreER</sup>*) (Sudarov et  
518 al., 2011). The second line carries a knock-in floxed *Vgat* allele (*Vgat<sup>flx</sup>*) (Tong et al., 2008). The  
519 third line expresses an enhanced yellow fluorescent protein (EYFP) knock-in construct with an  
520 upstream floxed transcriptional stop sequence, under the control of the *ROSA26* locus (*R26<sup>flx-stop-</sup>*  
521 *EYFP*) (Srinivas et al., 2001). Our genotyping procedures for all of these alleles have been  
522 described before (Sillitoe et al., 2009; White and Sillitoe, 2017; White et al., 2014). We bred the  
523 mice using standard timed pregnancies, and we designated noon on the day a vaginal plug was  
524 detected as embryonic day (E) 0.5 and the day of birth as P0. Mice of both sexes were studied.  
525 The mice were housed on a 14h/10h light/dark cycle.

526

527 *Cre induction.* Tamoxifen (Sigma) was dissolved at 37°C overnight in corn oil at a concentration  
528 of 20 mg/ml (Sillitoe et al., 2009; Zervas et al., 2004). An 18-gauge syringe was used to pipette  
529 the solution up and down and dissolve any remaining tamoxifen particles. For targeting the  
530 stellate cells, tamoxifen was delivered at a dosage of 200ug/g into P4 postnatal pups by  
531 subcutaneous injection into the skinfold at the back of the neck. The pups were allowed to rest in  
532 a separate cage to prevent the mother from licking out the tamoxifen. After ~15 minutes, or once  
533 the subcutaneous bolus of tamoxifen solution had completely dispersed, each pup was returned  
534 to its home cage. For targeting the basket cells, 200ug/g tamoxifen was add-mixed with 50ug/g  
535 progesterone and administered to pregnant dams by oral gavage (Bowers et al., 2012).

536

537 *Immunohistochemistry.* Perfusion and tissue fixation were performed as previously described  
538 (Sillitoe et al., 2008a). Briefly, mice were anesthetized by intraperitoneal injection with Avertin  
539 (2, 2, 2-Tribromoethanol, Sigma-Aldrich Cat # T4). Cardiac perfusion was performed with 0.1 M  
540 phosphate-buffered saline (PBS; pH 7.4), then by 4% paraformaldehyde (4% PFA) diluted in  
541 PBS. For cryoembedding, brains were post-fixed in 4°C for 24 to 48 hours in 4% PFA and then  
542 cryoprotected stepwise in sucrose solutions (15% and 30% diluted in PBS) and embedded in  
543 Tissue-Tek® O.C.T. Compound (Sakura, Torrance, CA, USA). Samples were cut on a cryostat  
544 with a thickness of 40 µm and sections were collected as free-floating sections and stored in  
545 PBS. Immunohistochemistry procedures on free-floating frozen tissue sections were described  
546 previously (Sillitoe et al., 2003, 2010; White and Sillitoe, 2013a; White et al., 2014). After  
547 staining, the tissue sections were placed on electrostatically coated slides and allowed to dry.

548

549 *Cerebellar circuit markers.* The integrity of the cerebellar circuitry was checked by determining  
550 the expression patterns of several synaptic and cell type-specific markers. Excitatory  
551 glutamatergic synapses contributed by granule cell parallel fibers were immunolabeled with  
552 rabbit anti-vesicular glutamate transporter 1 (anti-VGLUT1; 1:1000; Synaptic Systems,  
553 Göttingen, Germany). Excitatory synapses contributed by the mossy fibers in the granular layer  
554 (Gebre et al., 2012) and the climbing fibers in the molecular layer (Hisano et al., 2002) were  
555 immunolabeled with rabbit anti-VGLUT2 (1:500; Synaptic Systems, Göttingen, Germany; Cat. #  
556 135 403) and rabbit polyclonal anti-cocaine- and amphetamine-related transcript peptide (CART;  
557 1:250; Phoenix Pharmaceuticals, Burlingame, CA, USA; Cat. # H-003-62). The CART signal  
558 was amplified using a biotinylated secondary antibody (Vectastain Elite ABC method; Vector

559 Labs; Burlingame, CA, USA) and used to visualize climbing fibers mainly in lobules IX and X  
560 (Reeber et al., 2011).  
561  
562 Purkinje cells were marked with anti-calbindin (1:1,000; Cat. # 300; Swant, Marly, Switzerland),  
563 rabbit polyclonal anti-carbonic anhydrase or CAR8 (CAVIII, 1:1000l; Cat. # sc-67330, Santa  
564 Cruz Biotechnology), goat polyclonal anti-IP3R1 (1:500; Cat. # sc-6093, Santa Cruz  
565 Biotechnology, Dallas, TX, USA), goat polyclonal anti-ROR $\alpha$  (1:250; Cat. # sc-6062, Santa  
566 Cruz Biotechnology, Dallas, TX, USA), and mouse monoclonal anti-ankyrin-G (1:200; Cat. #  
567 MABN466, clone N106/36, Millipore Sigma, Burlington, MA, USA). Purkinje cells and  
568 molecular layer interneurons were marked with rabbit polyclonal anti-parvalbumin (1:1000;  
569 Swant, Marly, Switzerland; Cat. # PV25). Excitatory interneurons were marked by rabbit  
570 polyclonal anti-calretinin (1:500; Swant, Marly, Switzerland; Cat. # CR7699/3H). Granule cells  
571 were marked with rabbit polyclonal anti-gamma-aminobutyric acid receptor  $\alpha 6$  (GABAR $\alpha 6$ ;  
572 1:500; Millipore Sigma, Burlington, MA, USA; Cat. # AB5610). Golgi cell interneurons in the  
573 adult cerebellum were marked by rabbit polyclonal anti-neurogranin (1:500; Millipore Sigma,  
574 Burlington, MA, USA; Cat. # AB5620) (Singec et al., 2003). NeuN (1:250; Millipore Sigma,  
575 Burlington, MA, USA; Cat. #mab377) was used as a general neuronal marker and carbonic  
576 anhydrase II (CAII; BioRad, Hercules, CA, USA; Cat. # 00073) was used to label  
577 oligodendrocytes. Neuronal processes were also labeled with various markers. Mouse  
578 monoclonal anti-neurofilament heavy (NFH; also called anti-SMI-32; 1:1500; Covance,  
579 Princeton, NJ) immunolabeled the soma, dendrites, and axons of adult Purkinje cells, and the  
580 axons and terminals of basket cells. Mouse monoclonal anti-hyperpolarization-activated cyclic  
581 nucleotide-gated channel 1 (HCN1; 1:200; Alomone Labs; Jerusalem, Israel, Cat. # APC-056)

582 was also used to label basket cell axons and pinceaux terminals. Guinea pig anti-gephyrin  
583 (1:500; Synaptic Systems, Göttingen, Germany, Cat. #147 004) was processed on paraffin  
584 embedded tissue cut at 10  $\mu$ m. Some tissue sections were double-labeled with the different  
585 markers listed above plus chicken anti-GFP (1:1000; Abcam, Cambridge, UK, Cat. # AB13970)  
586 in order to visualize the EYFP and mGFP reporter expression.

587

588 For fluorescence immunostaining, we used Alexa-488, -555, and -647 secondary goat anti-mouse  
589 and anti-rabbit antibodies (1:1500, 1:1500, and 1:1000, respectively; Molecular Probes Inc.,  
590 Eugene, OR, USA). For chromogenic immunostaining, we used horseradish peroxidase (HRP)-  
591 conjugated secondary goat anti-mouse or anti-rabbit antibodies (1:200; DAKO, Carpinteria, CA,  
592 USA). Antibody binding was revealed by incubating the tissue in the peroxidase substrate 3,3'-  
593 diaminobenzidine (DAB; Sigma-Aldrich, St Louis, MO, USA), which was made by dissolving a  
594 100 mg DAB tablet in 40 ml PBS and 10  $\mu$ L 30% H<sub>2</sub>O<sub>2</sub>. The DAB reaction was stopped with  
595 PBS when the optimal color intensity was reached. To preserve and contrast the fluorescence  
596 signal the tissue sections were mounted either with Fluoro-gel (Electron Microscopy Sciences,  
597 Hatfield, PA, USA) or a medium containing DAPI (Vectashield Antifade Mounting Medium  
598 with DAPI; Cat. # H-1200, Vector Laboratories, Burlingame, CA, USA).

599

600 *Imaging of immunostained tissue.* Photomicrographs of the tissue sections were captured using  
601 Zeiss AxioCam MRm (fluorescence) and AxioCam MRc5 (DAB-reacted tissue sections)  
602 cameras mounted on a Zeiss Axio Imager.M2 microscope or on a Zeiss Axio Zoom.V16. Images  
603 of tissue sections were acquired and analyzed using either Zeiss AxioVision software (release  
604 4.8) or Zeiss ZEN software (2012 edition). After imaging the tissue, the raw data were imported

605 into Adobe Photoshop CS6 and corrected for brightness and contrast levels. The schematics were  
606 drawn in Adobe Illustrator CS6.

607

608 *VGAT quantification.* We determined whether Cre induction deleted VGAT in interneurons by  
609 immunolabeling sagittal tissue sections from 1-month old mice with guinea pig anti-VGAT  
610 antibody (1:500; Synaptic Systems, Cat # 131 004; Göttingen, Germany). Images of the  
611 molecular layer were acquired with 20x magnification using Zeiss Axioimager microscope, in z-  
612 stack and ApoTome mode. Using the Fiji software for analysis, the background was subtracted  
613 using the built-in rolling ball method. The same settings were used for control and mutant tissue.  
614 The molecular layer was divided dorso-ventrally into three levels, and the levels were saved as  
615 regions of interest (ROI). The area and number of puncta in each level was measured using the  
616 built-in Analyze Particles function in Fiji and the density of VGAT-positive puncta for each level  
617 was calculated. Statistical significance at  $p < 0.05$  was determined using the Student's *t*-test.

618

619 *Molecular layer thickness measurement.* Molecular layer thickness was measured from 3 mice  
620 per genotype in 3-4 sagittal sections spanning the midline per mouse, with a distance of  $\sim 80 \mu\text{m}$   
621 in between each section. The tissues were immunostained with mouse monoclonal or rabbit  
622 polyclonal anti-calbindin (1:1,000; Cat. # 300; Swant, Marly, Switzerland) or anti-carbonic  
623 anhydrase to mark the Purkinje cell and molecular layers and NeuroTrace fluorescent Nissl stain  
624 (Life Technologies, Grand Island, NY, USA) or DAPI (Vectashield Antifade Mounting Medium  
625 with DAPI; Cat. # H-1200, Vector Laboratories, Burlingame, CA, USA) to mark the granular  
626 layer. The distance from the edge of the Purkinje cell soma to the apical edge of the molecular  
627 layer in the lobule III/IV region was measured using a line measurement tool from Fiji

628 (Schindelin et al., 2012). Measurements for each mouse were averaged and the numbers  
629 computed from each genotype were pooled and averaged again to obtain the mean molecular  
630 layer thickness. Statistical significance was defined as  $p < 0.05$  using the Student's *t*-test.

631

632 *Electron Microscopy.* Mice were anesthetized with Avertin and perfused with 0.9% room  
633 temperature saline, followed by an ice-cold solution of 4% paraformaldehyde and 2%  
634 glutaraldehyde in 0.1M sodium cacodylate buffer (pH 7.4; 305-315 mOsm). Brains were  
635 harvested and cerebella were sagittally sectioned using a rodent brain matrix while immersed in  
636 fixative. The sections were transferred with fixative to a dish and the position of the molecular  
637 layer was noted. The region was chopped into pieces measuring less than 1 mm x 1mm. The  
638 pieces were aspirated into a sample vial and fixed for 48 hours in 4°C. Samples were treated with  
639 1% Osmium tetroxide in 0.1M cacodylate buffer for secondary fixation, then subsequently  
640 dehydrated in ethanol and propylene oxide and embedded in Embed-812 resin (Electron  
641 Microscopy Science, Hatfield, PA). Procedures were performed in a Ted Pella Bio Wave  
642 microwave oven with vacuum attachment. Tissues were cut with a Leica UC7 microtome into  
643 50nm ultra-thin sections and collected on Formvar-coated copper grids (Electron Microscopy  
644 Science, Hatfield, PA). Specimens were then stained with 1% uranyl acetate and 2.5% lead  
645 citrate and imaged using a JEOL JEM 1010 transmission electron microscope with an AMT XR-  
646 16 mid-mount 16 mega-pixel CCD camera. The images were imported into ImageJ where a  
647 smoothing function was applied and then the data were assembled in Adobe Photoshop CS6.

648

649 *Surgery.* Surgery for awake recordings was performed as detailed in White et al. (White et al.,  
650 2016a). Mice were sedated by gas anesthesia using 3% isoflurane, then injected with a ketamine-

651 dexmedetomidine cocktail at a dosage of 80/16 mg/kg, respectively. They were then transferred  
652 from the anesthesia chamber to a stereotaxic platform (David Kopf Instruments, Tujunga, CA,  
653 USA) and head-fixed with metal ear bars. Sterile surgery techniques were followed. A custom-  
654 made headplate was first attached to the Bregma region using Metabond. This headplate was  
655 used to affix the mouse's head to the awake recording apparatus. After the adhesive has dried, a  
656 small hole slightly smaller than a 1/16 screw (00-90x1/16 flat point stainless steel machine  
657 screws #B002SG89QQ) was drilled to the left of the cerebellar midline. Drilling was stopped  
658 before the skull was completely penetrated. An ethanol-sterilized 1/16 screw, which served as an  
659 anchor for dental cement, was secured into the drillhole with a screwdriver until it was tightly in  
660 place. Another craniotomy was performed on the right side of the midline. A hole approximately  
661 ~5 mm in diameter was drilled, taking care not to damage the dura. Once the craniotomy was  
662 complete, the hole was covered in triple antibiotic ointment to prepare for the installation of the  
663 recording chamber. A piece of straw with a 5-7 mm diameter and a height of 4-5 mm was  
664 ethanol-sterilized and air-dried. One end of the straw was dipped in Metabond and carefully  
665 placed on top of the craniotomy. Once the adhesive was dry, dental cement (A-M Systems dental  
666 cement powder #525000 and solvent #526000) was applied on the outer edge of the straw to fill  
667 in holes and to further secure the chamber. After the dental cement had dried, a fresh layer was  
668 applied around the straw and the Bregma region where the headplate was attached. After the  
669 layer dried, a final layer was applied throughout the site of surgery, including the screw, the top  
670 and underside of the headplate, and along the edges of the straw. The skin surrounding the site of  
671 the surgery was fixed to the dental cement using 3M Vetbond (#NC0304169) after the cement  
672 has completely dried. While the last layer of dental cement was drying, 0.6 mg/kg buprenorphine  
673 was injected subcutaneously as an analgesic. After the surgery, the mouse was placed in a

674 warming box (V500, Peco Services Ltd., Cumbria, UK) to prevent hypothermia while the  
675 anesthesia wears off. Once the mouse was awake and mobile, it was returned to the home cage.  
676 The mouse was allowed to recover for 2-3 days and was given buprenorphine every 6-12 hours.  
677 On the third day, training on the running wheel was started. Training sessions were done twice a  
678 day for 30 minutes. Before recording, the antibiotic ointment in the chamber was removed using  
679 a compressed foam-tipped swab (Cleanfoam<sup>®</sup> Swab) and replaced with 0.9% w/v NaCl solution.  
680 After each recording session, the solution was removed with a cotton tip or by aspiration with a  
681 micropipette and fresh antibiotic ointment applied.

682

683 *In vivo electrophysiology.* Single-unit extracellular recordings were performed as described  
684 previously (Arancillo et al., 2015; White and Sillitoe, 2017; White et al., 2016b). During the  
685 recordings, the reference electrode tip was immersed in the saline chamber. Tungsten electrodes  
686 (Thomas Recording, Giessen, Germany) with an impedance of 5-8 M $\Omega$  were controlled from a  
687 headstage using a motorized micromanipulator (MP-225; Sutter Instrument Co., Novato, CA,  
688 USA). Signals were acquired using an ELC-03XS amplifier (NPI Electronic Instruments, Tamm,  
689 Germany) with band-pass filter settings of 0.3-13 kHz. Analog signals were digitized using a  
690 CED Power 1401 and stored and analyzed using Spike 2 software (CED, Cambridge, UK).

691

692 Purkinje cells were recorded at a depth of approximately 0-2 mm from the tissue surface while  
693 the mouse was alert and standing on a wheel. Purkinje cells were identified by the unique  
694 presence of two types of action potentials: simple spikes, which are intrinsically generated, and  
695 complex spikes, which are generated by climbing fiber input. Neurons from which we obtained  
696 clear, continuous recordings lasting 200-300 seconds were included in the analysis. Analysis of



697 firing properties was performed using Spike2, MS Excel, and GraphPad Prism. Firing rate (Hz)  
698 was calculated as the number of spikes recorded over a given time period. Coefficient of  
699 variance, or CV, was calculated as the ratio of the standard deviation of the interspike intervals  
700 (ISI) over the mean ISI. CV2 was calculated with the formula ( $CV2 = 2|ISI_{n+1} -$   
701  $ISI_n| / (ISI_{n+1} + ISI_n)$ ), as described previously (Holt et al., 1996). Purkinje cell simple spike and  
702 complex spike activity was sorted, analyzed, and data reported as mean  $\pm$  standard error of the  
703 mean (SEM). GraphPad Prism ROUT method of outlier detection was used with Q = 1% to  
704 remove outlier cells before further analysis. Statistical analyses were performed with unpaired,  
705 two-tailed Student's t-tests. Statistical significance is indicated in the graphs as \* $P < 0.05$ ,  
706 \*\* $P < 0.01$ , \*\*\* $P < 0.001$ , \*\*\*\* $P < 0.0001$ . The number of Purkinje cells that were analyzed for  
707 each measurement is indicated with "n", while the number of mice recorded for each genotype  
708 analyzed is indicated with "N".  
709

710 **Figure Legends**

711 **Figure 1.** The *Ascl1<sup>CreER</sup>* allele can be used for genetic marking of stellate cells and basket cells

712 **(A)** Schematic of cerebellar circuitry. Purkinje cell (yellow), basket cell (red), and stellate cell  
713 (blue) are colorized while other cells and fibers in the cerebellar cortex are represented in  
714 grayscale. Dotted lines represent the borders of the Purkinje cell layer (PCL) with the molecular  
715 layer (ML) and granule cell layer (GL). **(B-C)** Golgi-Cox stain of cerebellar tissue. **(B)** Basket  
716 cell (arrowhead) and Purkinje cell (asterisk) revealed by Golgi-Cox stain. Scale = 50µm. **(C)**  
717 Stellate cell (arrowhead) and Purkinje cells (asterisks) revealed by Golgi-Cox stain. Scale =  
718 50µm. **(D)** Representation of breeding scheme. **(E)** Schematic of methods for tamoxifen  
719 administration. Tamoxifen was administered via oral gavage to pregnant dams at E18.5 to  
720 achieve constitutive marking and manipulation of a subset of basket cells in the resulting pups  
721 (upper left). Tamoxifen was administered via subcutaneous injection into the scruff of pups at P4  
722 to achieve constitutive marking and manipulation of a subset of stellate cells (bottom right). **(F-**  
723 **G)** Sagittal cerebellar sections from tamoxifen-treated animals stained with parvalbumin, a  
724 marker of inhibitory cerebellar neurons including Purkinje cells and molecular layer  
725 interneurons, and GFP to highlight the genetically marked cells. Scale = 50µm. **(F)** Sagittal  
726 cerebellar section from an animal treated with tamoxifen at the basket cell marking time point.  
727 **(G)** Sagittal cerebellar section from an animal treated with tamoxifen at the stellate cell marking  
728 time point.

729

730 **Figure 2.** *Ascl1<sup>CreER</sup>* conditional deletion of VGAT protein is efficient and selective

731 **(A-B)** Sagittal cerebellar sections stained with GFP to reveal labeled basket and stellate cells. **(A)**

732 Labeled basket cell somas are predominantly found in the basal molecular layer (ML) and their

733 processes form conspicuous baskets around Purkinje cell somas in the Purkinje cell layer (PCL)

734 (left). Labeled stellate cell somas are principally found in the apical ML with no processes

735 forming baskets around Purkinje cell somas (right). Scale = 20 $\mu$ m. **(B)** Some labeled basket cells

736 were found in more apical regions of the ML, however their processes still descended through

737 the ML to form baskets around Purkinje cell somas (left). Some labeled stellate cells were found

738 towards basal regions of the ML, however their processes ascended to the apical ML and did not

739 form baskets around Purkinje cell somas (right). Scale = 20 $\mu$ m. **(C)** Sagittal cerebellar tissue

740 with ML interneuron somas stained with ROR $\alpha$  and genetically labeled cells stained with GFP.

741 Control tissue stained with ROR $\alpha$  shows ROR $\alpha$  expression in some Purkinje cells and uniformly

742 throughout the ML in molecular layer interneurons (left). ROR $\alpha$  expression is unaltered in basket

743 cell (middle) and stellate cell (right) silenced mutant mice. Scale = 50 $\mu$ m. **(D)** Representation of

744 recombination quantification in a sagittal cerebellar section with labeled stellate cells. Inhibitory

745 interneurons including Purkinje cells and ML interneurons are stained with parvalbumin.

746 Labeled cells are stained with GFP and counted (yellow circles). Scale = 50 $\mu$ m. **(E)**

747 Quantification of recombination efficiency in basket and stellate cell conditions (basket cell

748 recombination: 34.26%  $\pm$  1.316%; stellate cell recombination: 35.69%  $\pm$  4.458%). **(F-G)** Sample

749 of a whole sagittal cerebellar section in the basket **(F)** and stellate **(G)** manipulation conditions.

750 Scale = 0.5mm. **(F)** In the basket cell marking condition, granule cells are highlighted with heavy

751 DAPI staining and marked cells are found throughout the section with no obvious patterning and

752 close to the granule cell layer in the basal ML. **(G)** In the stellate cell marking condition,

753 Purkinje cells and ML interneurons are stained with parvalbumin. Labeled cells are stained with  
754 GFP and found in the apical molecular layer throughout the section with no obvious patterning.  
755 **(F-G)** Cerebellar lobules are indicated with Roman numerals. Scale = 0.5mm. **(H)** Sagittal  
756 cerebellar tissue stained with VGAT to mark inhibitory synapses. VGAT expression was  
757 uniform across the ML in control mice (left), but was significantly reduced in the basal and  
758 middle ML in basket cell VGAT deletion mice (middle) and significantly reduced in the apical  
759 ML in stellate cell VGAT deletion mice (right). Scale = 50 $\mu$ m. **(I)** Quantification of VGAT  
760 puncta density in the basal, middle, and apical ML of basket and stellate VGAT mutant mice  
761 (basket cell mean VGAT density as percent of control: apical = 57.69%  $\pm$  8.799, middle =  
762 43.33%  $\pm$  9.317, basal = 42.62%  $\pm$  8.560; stellate cell mean VGAT density as percent of control:  
763 apical = 36.26%  $\pm$  3.621, middle = 49.08%  $\pm$  8.957, basal = 76.63%  $\pm$  17.23). **(J)** Quantification  
764 of VGAT puncta density throughout the entire ML of basket and stellate VGAT mutant mice.  
765 There is no significant difference in the density of VGAT puncta between the two mutant  
766 conditions (basket cell mean VGAT density as percent of control = 47.95  $\pm$  7.962; stellate mean  
767 VGAT density as percent of control = 54.03  $\pm$  8.703;  $P$  = 0.6336). **(A-D, H)** Dotted lines  
768 indicate the borders of the Purkinje cell layer (PCL) with the molecular layer (ML) above and the  
769 granule layer (GL) below.

770

771 **Figure 3.** Genetic depletion of GABAergic molecular layer interneuron neurotransmission alters  
772 Purkinje cell firing *in vivo*

773 **(A)** Schematic of electrophysiology setup for *in vivo* extracellular recordings. A sharp metal  
774 electrode is lowered into the cerebellum of awake mice (above) to target Purkinje cells for  
775 single-unit recordings (below). **(B)** Picture of a mouse in the electrophysiology setup. The mouse  
776 is headfixed and able to walk on a cylindrical foam wheel. **(C)** Example extracellular recordings  
777 of Purkinje cells in a control (top), stellate cell mutant (middle), and basket cell mutant (bottom)  
778 mouse. Complex spikes are indicated with asterisks. Scale = 20ms. **(D)** Schematic of a stellate  
779 cell (green) in relation to a Purkinje cell (grey). **(E-G)** Quantification of Purkinje simple spike  
780 electrophysiology in awake stellate cell control (N = 7, n = 20) and stellate cell mutant (N = 3, n  
781 = 15) mice. **(E)** Quantification of Purkinje cell simple spike firing frequency in stellate cell  
782 control and mutant conditions. Firing frequency was unchanged in the stellate cell silencing  
783 condition (stellate cell control =  $74.99\text{Hz} \pm 6.031\text{Hz}$ ; VGAT KO =  $76.85\text{Hz} \pm 8.298\text{Hz}$ ;  $P =$   
784  $0.8577$ ). **(F)** Quantification of Purkinje cell simple spike coefficient of variance (CV) in stellate  
785 cell control and mutant conditions. CV was not significantly changed from control in the stellate  
786 cell mutant animals (stellate cell control mean =  $0.5787 \pm 0.0264$ ; stellate cell mutant mean =  
787  $0.5333 \pm 0.03603$ ;  $P = 0.3181$ ). **(G)** Quantification of Purkinje cell simple spike CV2 in stellate  
788 cell control and mutant conditions. CV2 was significantly decreased from control in the stellate  
789 cell mutant condition (stellate cell control mean =  $0.5186 \pm 0.01968$ ; stellate cell mutant mean =  
790  $0.4091 \pm 0.01220$ ;  $P < 0.0001$ ). **(H)** Schematic of a climbing fiber (magenta) to a stellate cell  
791 (green) and a Purkinje cell (grey). **(I-K)** Quantification of Purkinje complex spike  
792 electrophysiology in awake stellate cell control (N = 7, n = 20) and stellate cell mutant (N = 3, n  
793 = 15) mice. **(I)** Quantification of Purkinje cell complex spike firing frequency in stellate cell

794 control and mutant conditions. Firing frequency was significantly increased over control in the  
795 stellate cell silencing condition (stellate cell control mean =  $1.186\text{Hz} \pm 0.06845\text{Hz}$ ; stellate cell  
796 mutant mean =  $1.469\text{Hz} \pm 0.08279\text{Hz}$ ;  $P = 0.0131$ ). **(N)** Quantification of Purkinje cell complex  
797 spike coefficient of variance (CV) in stellate cell control and mutant conditions. CV was not  
798 significantly changed from control in stellate cell mutant animals (stellate cell control mean =  
799  $0.8412 \pm 0.03723$ ; stellate cell mutant mean =  $0.7650 \pm 0.02704$ ;  $P = 0.1076$ ). **(O)**  
800 Quantification of Purkinje cell complex spike CV2 in stellate cell control and mutant conditions.  
801 CV2 was not significantly changed from control in the stellate cell VGAT deletion condition  
802 (stellate cell control =  $0.8819 \pm 0.02203$ ; stellate VGAT KO =  $0.8456 \pm 0.01697$ ;  $P = 0.2006$ ).  
803 **(L)** Schematic of a basket cell (green) in relation to a Purkinje cell (grey). **(M-O)** Quantification  
804 of Purkinje simple spike electrophysiology in awake basket cell control ( $N = 5$ ,  $n = 17$ ) and  
805 basket cell mutant ( $N = 3$ ,  $n = 18$ ) mice. **(M)** Quantification of Purkinje cell simple spike firing  
806 frequency in basket cell control and mutant conditions. Firing frequency was significantly  
807 increased over control in the basket cell silencing condition (basket cell control mean =  $64.56\text{Hz}$   
808  $\pm 4.615\text{Hz}$ ; basket cell mutant mean =  $84.76 \pm 5.670\text{Hz}$ ;  $P = 0.0094$ ). **(N)** Quantification of  
809 Purkinje cell simple spike coefficient of variance (CV) in basket cell control and mutant  
810 conditions. CV was not significantly changed from control in basket cell mutant animals (basket  
811 cell control mean =  $0.5996 \pm 0.03410$ ; basket cell mutant mean =  $0.5611 \pm 0.03852$ ;  $P =$   
812  $0.4599$ ). **(O)** Quantification of Purkinje cell simple spike CV2 in basket cell control and mutant  
813 conditions. CV2 was not significantly changed from control in the basket cell VGAT deletion  
814 condition (basket cell control =  $0.5223 \pm 0.02673$ ; basket cell VGAT KO =  $0.4688 \pm 0.03437$ ;  $P$   
815 =  $0.2282$ ). **(P)** Schematic of a climbing fiber (magenta) to a basket cell (green) and a Purkinje  
816 cell (grey). **(Q-S)** Quantification of Purkinje complex spike electrophysiology in awake basket

817 cell control (N = 5, n = 17) and basket cell mutant (N = 3, n = 18) mice. **(Q)** Quantification of  
818 Purkinje cell complex spike firing frequency in basket cell control and mutant conditions. Firing  
819 frequency was significantly decreased from control in the basket cell silencing condition (basket  
820 cell control mean = 1.538Hz  $\pm$  0.07298Hz; basket cell mutant mean = 1.148Hz  $\pm$  0.03695Hz; *P*  
821 < 0.0001). **(R)** Quantification of Purkinje cell complex spike coefficient of variance (CV) in  
822 basket cell control and mutant conditions. CV was not significantly changed from control in  
823 basket cell mutant animals (basket cell control mean = 0.7074  $\pm$  0.01833; basket cell mutant  
824 mean = 0.7342  $\pm$  0.01970; *P* = 0.3252). **(S)** Quantification of Purkinje cell complex spike CV2  
825 in basket cell control and mutant conditions. CV2 was not significantly changed from control in  
826 the basket cell VGAT deletion condition (basket cell control = 0.8533  $\pm$  0.01476; basket VGAT  
827 KO = 0.8552  $\pm$  0.02171; *P* = 0.9414).

828

829 **Figure 4.** Deleting *Vgat* in molecular layer interneurons does not rearrange cerebellar circuitry or  
830 induce neurodegeneration

831 **(A-B)** Example images of sagittal cerebellar sections used for quantification of ML thickness  
832 wherein Purkinje cells were stained with either calbindin or CAR8 and all neurons were stained  
833 with either nissl or DAPI to facilitate visibility of the Purkinje cell layer (PCL) compared to the  
834 molecular layer (ML) and granule layer (GL). Scale = 50 $\mu$ m. ML thickness was unchanged in  
835 the stellate silencing condition **(A)** or the basket cell silencing condition **(B)**. **(C)** Quantification  
836 of ML thickness in all conditions. ML thickness is not significantly changed from control in  
837 either basket cell or stellate cell mutant animals (basket cell control mean = 179.9 $\mu$ m  $\pm$  3.833,  
838 basket cell mutant mean = 181.1 $\mu$ m  $\pm$  3.164,  $P$  = 0.8200; stellate cell control mean = 159.7 $\mu$ m  $\pm$   
839 9.201, stellate cell mutant mean = 157.2 $\mu$ m  $\pm$  5.493,  $P$  = 0.8288). **(D-G)** TEM images revealed  
840 normal synapses in all conditions. Purkinje cells and processes are colorized in magenta and  
841 identified basket and stellate synaptic terminals are colorized in green. Scale = 200nm. Inhibitory  
842 synapses onto Purkinje cell dendrites in the ML were unchanged from the control **(D)** in stellate  
843 cell mutant mice **(E)**. Similarly, inhibitory synapses onto Purkinje cell somas were unchanged  
844 from the control **(F)** in basket cell mutant mice **(G)**. **(H-M)** Gephyrin expression was unchanged  
845 in stellate cell mutant mice compared to control. Scale = 20 $\mu$ m. Control mice **(H-J)** have  
846 uniform expression of VGAT in the ML **(H)** and similarly uniform expression of gephyrin at  
847 inhibitory synapses in the ML **(I)**. Triple staining reveals gephyrin is present at inhibitory  
848 synapses in the ML. Example triple labeled synapses (arrowhead) are shown in the blowup **(J)**.  
849 Stellate cell mutant mice do not have uniform expression of VGAT in the ML as a result of the  
850 targeted deletion of VGAT **(K)**. However, gephyrin appears uniformly expressed **(L)** suggesting  
851 it is present at synapses as normal, despite the depletion of VGAT **(M)**. **(N-S)** Postsynaptic



852 structures are also unchanged in basket cell mutant mice. HCN1 staining suggests the region of  
853 the basket cell pinceau is unchanged from control (**N**) in basket cell mutant mice (**O**). Scale =  
854 20 $\mu$ m. (**P-S**) The Purkinje cell axon initial segment (stained with ankyrin G and indicated by  
855 arrowheads) is obvious in control (**P-Q**) and basket cell mutant mice (**R-S**) throughout the  
856 cerebellum with example images show from both anterior and posterior lobules. Purkinje cells  
857 are stained with calbindin with their somas indicated by asterisks. Scale = 10 $\mu$ m. (**A-B, H-S**)  
858 Dotted lines indicate the borders of the Purkinje cell layer (PCL) with the molecular layer (ML)  
859 above and the granule layer (GL) below.

860

861 **Figure 5.** Conditional deletion of *Vgat* in molecular layer interneurons does not lead to gross  
862 cerebellar changes in cellular composition, cellular distribution, or layer patterning  
863 **(A-X)** Cerebellar cell types were present and appeared unchanged in location and morphology  
864 despite the lack of VGAT in basket cells and stellate cells. Dotted lines indicate the borders of  
865 the Purkinje cell layer (PCL) with the molecular layer (ML) and the granule layer (GL). Scale =  
866 20 $\mu$ m. CAR8 and IP3R1 staining revealed normal Purkinje cell location and morphology **(A-C)**.  
867 GABA $\alpha$ R6 showed normal expression in granule cells **(D-F)**. NFH expression was unchanged in  
868 Purkinje and basket cells **(G-I)**. Neurogranin expression in Golgi cells was unchanged in all  
869 conditions **(J-L)**. In the mutants, VGLUT1 staining in mossy and parallel fibers was unchanged  
870 **(M-O)** compared to control conditions and similarly VGLUT2 was present in mossy fiber  
871 terminals in the granule cell layer and climbing fibers in the molecular layer **(P-R)**. Staining of  
872 unipolar brush cells with calretinin was similar between controls and mutants **(S-U)**. CART  
873 staining of climbing fibers in the mutants was also consistent with controls **(V-X)**.  
874

875 **Figure 6.** Conditional deletion of *Vgat* with *Ascl1<sup>CreER</sup>* occurs in extracerebellar cell types that  
876 are unlikely to affect Purkinje cell activity in this manipulation.

877 **(A)** Sparse labeling of cells occurs outside the cerebellum at the basket cell time point. Scale =  
878 1mm. **(B-G)** Many of the cells outside the cerebellum had morphologies that resembled glia,  
879 with the notable exception of cells in the olfactory bulb **(G)** where the majority of cells had the  
880 morphology of neurons, though cells with glial-like morphology were also present. Scale =  
881 20 $\mu$ m. **(H)** Sparse labeling outside of the cerebellum also occurred at the stellate time point.  
882 Scale = 1mm. **(I-N)** While again many of the cells had morphologies that resembled glia, some  
883 cells with neuron-like morphologies were also detected. **(K)** Very sparse labeling of putative  
884 granule cells in the dentate gyrus occurred at the stellate time point, unlike at the basket cell time  
885 point at which no neurons were detected in the hippocampus. **(N)** Similar to the basket cell time  
886 point, many neurons in the olfactory bulb were labeled in addition to some glial-like cells. Scale  
887 = 20 $\mu$ m. **(O)** Recombined cells with glial-like morphologies co-labeled with GFP and CAII, a  
888 maker of oligodendrocytes. Scale = 20 $\mu$ m. **(P)** Cells with neuron-like morphologies in the  
889 dentate gyrus of the hippocampus colabeled with GFP and NeuN. Scale = 20 $\mu$ m. **(Q)** Both  
890 neurons (arrow, co-labeled with GFP and NeuN) and glia (arrowhead, only labeled with GFP and  
891 not by NeuN) were labeled in the olfactory bulb. Scale = 20 $\mu$ m.

892

893 **Literature cited**

- 894 Alcami, P., and Marty, A. (2013). Estimating functional connectivity in an electrically coupled  
895 interneuron network. *Proc. Natl. Acad. Sci. U. S. A.* *110*, E4798-807.
- 896 Altman, J., and Bayer, S.A. (Shirley A. (1997). Development of the cerebellar system : in  
897 relation to its evolution, structure, and functions (CRC Press).
- 898 Ango, F., di Cristo, G., Higashiyama, H., Bennett, V., Wu, P., and Huang, Z.J. (2004). Ankyrin-  
899 based subcellular gradient of neurofascin, an immunoglobulin family protein, directs  
900 GABAergic innervation at purkinje axon initial segment. *Cell* *119*, 257–272.
- 901 Ankri, L., Husson, Z., Pietrajtis, K., Proville, R., Léna, C., Yarom, Y., Dieudonné, S., and  
902 Uusisaari, M.Y. (2015). A novel inhibitory nucleo-cortical circuit controls cerebellar  
903 Golgi cell activity. *Elife* *4*.
- 904 Apps, R., and Hawkes, R. (2009). Cerebellar cortical organization: a one-map hypothesis. *Nat.*  
905 *Rev. Neurosci.* *10*, 670–681.
- 906 Arancillo, M., White, J.J., Lin, T., Stay, T.L., and Sillitoe, R. V. (2015). In vivo analysis of  
907 Purkinje cell firing properties during postnatal mouse development. *J. Neurophysiol.* *113*,  
908 578–591.
- 909 Barbour, B. (1993). Synaptic currents evoked in purkinje cells by stimulating individual granule  
910 cells. *Neuron* *11*, 759–769.
- 911 Barmack, N.H., and Yakhnitsa, V. (2008). Functions of interneurons in mouse cerebellum. *J.*  
912 *Neurosci.* *28*, 1140–1152.
- 913 Bowers, M., Eng, L., Lao, Z., Turnbull, R.K., Bao, X., Riedel, E., Mackem, S., and Joyner, A.L.

- 914 (2012). Limb anterior-posterior polarity integrates activator and repressor functions of  
915 GLI2 as well as GLI3. *Dev. Biol.* *370*, 110–124.
- 916 Brochu, G., Maler, L., and Hawkes, R. (1990). Zebrin II: a polypeptide antigen expressed  
917 selectively by Purkinje cells reveals compartments in rat and fish cerebellum. *J. Comp.*  
918 *Neurol.* *291*, 538–552.
- 919 Buttermore, E.D., Piochon, C., Wallace, M.L., Philpot, B.D., Hansel, C., and Bhat, M.A. (2012).  
920 Pinceau organization in the cerebellum requires distinct functions of neurofascin in  
921 Purkinje and basket neurons during postnatal development. *J. Neurosci.* *32*, 4724–4742.
- 922 Cerminara, N.L., Lang, E.J., Sillitoe, R. V., and Apps, R. (2015). Redefining the cerebellar  
923 cortex as an assembly of non-uniform Purkinje cell microcircuits. *Nat. Rev. Neurosci.* *16*,  
924 79–93.
- 925 Cesana, E., Pietrajtis, K., Bidoret, C., Isope, P., D’Angelo, E., Dieudonne, S., and Forti, L.  
926 (2013). Granule Cell Ascending Axon Excitatory Synapses onto Golgi Cells Implement a  
927 Potent Feedback Circuit in the Cerebellar Granular Layer. *J. Neurosci.* *33*, 12430–12446.
- 928 Chan-Palay, V., Palay, S.L., and Wu, J.Y. (1982). Sagittal cerebellar microbands of taurine  
929 neurons: immunocytochemical demonstration by using antibodies against the taurine-  
930 synthesizing enzyme cysteine sulfinic acid decarboxylase. *Proc. Natl. Acad. Sci. U. S. A.*  
931 *79*, 4221–4225.
- 932 Chavas, J., and Marty, A. (2003). Coexistence of excitatory and inhibitory GABA synapses in  
933 the cerebellar interneuron network. *J. Neurosci.* *23*, 2019–2031.
- 934 Croci, L., Chung, S.-H., Masserdotti, G., Gianola, S., Bizzoca, A., Gennarini, G., Corradi, A.,  
935 Rossi, F., Hawkes, R., and Consalez, G.G. (2006). A key role for the HLH transcription

- 936 factor EBF2COE2,O/E-3 in Purkinje neuron migration and cerebellar cortical  
937 topography. *Development* *133*, 2719–2729.
- 938 Díaz-Rojas, F., Sakaba, T., and Kawaguchi, S.-Y. (2015). Ca(2+) current facilitation determines  
939 short-term facilitation at inhibitory synapses between cerebellar Purkinje cells. *J. Physiol.*  
940 *593*, 4889–4904.
- 941 Dizon, M.J., and Khodakhah, K. (2011). The role of interneurons in shaping Purkinje cell  
942 responses in the cerebellar cortex. *J. Neurosci.* *31*, 10463–10473.
- 943 Eccles, J.C. (1967). Circuits in the cerebellar control of movement. *Proc. Natl. Acad. Sci. U. S.*  
944 *A.* *58*, 336–343.
- 945 Eccles, J.C., Llinás, R., and Sasaki, K. (1965). Inhibitory systems in the cerebellar cortex. *Proc.*  
946 *Aust. Assoc. Neurol.* *3*, 7–14.
- 947 Eccles, J.C., Llinás, R., and Sasaki, K. (1966a). Parallel fibre stimulation and the responses  
948 induced thereby in the Purkinje cells of the cerebellum. *Exp. Brain Res.* *1*, 17–39.
- 949 Eccles, J.C., Llinás, R., and Sasaki, K. (1966b). The mossy fibre-granule cell relay of the  
950 cerebellum and its inhibitory control by Golgi cells. *Exp. Brain Res.* *1*, 82–101.
- 951 Eccles, J.C., Nicoll, R.A., Schwarz, D.W., Taborkova, H., and Willey, T.J. (1976). Medial  
952 reticular and perihypoglossal neurons projecting to cerebellum. *J. Neurophysiol.* *39*, 102–  
953 108.
- 954 Gaffield, M.A., and Christie, J.M. (2017). Movement Rate Is Encoded and Influenced by  
955 Widespread, Coherent Activity of Cerebellar Molecular Layer Interneurons. *J. Neurosci.*  
956 *37*, 4751–4765.

- 957 Gao, Z., Proietti-Onori, M., Lin, Z., ten Brinke, M.M., Boele, H.-J., Potters, J.-W., Ruigrok,  
958 T.J.H., Hoebeek, F.E., and De Zeeuw, C.I. (2016). Excitatory Cerebellar Nucleocortical  
959 Circuit Provides Internal Amplification during Associative Conditioning. *Neuron* 89,  
960 645–657.
- 961 Gebre, S.A., Reeber, S.L., and Sillitoe, R. V (2012). Parasagittal compartmentation of cerebellar  
962 mossy fibers as revealed by the patterned expression of vesicular glutamate transporters  
963 VGLUT1 and VGLUT2. *Brain Struct. Funct.* 217, 165–180.
- 964 Guo, C., Witter, L., Rudolph, S., Elliott, H.L., Ennis, K.A., and Regehr, W.G. (2016). Purkinje  
965 Cells Directly Inhibit Granule Cells in Specialized Regions of the Cerebellar Cortex.  
966 *Neuron* 91, 1330–1341.
- 967 Hamilton, B.A., Frankel, W.N., Kerrebrock, A.W., Hawkins, T.L., FitzHugh, W., Kusumi, K.,  
968 Russell, L.B., Mueller, K.L., van Berkel, V., Birren, B.W., et al. (1996). Disruption of the  
969 nuclear hormone receptor RORalpha in staggerer mice. *Nature* 379, 736–739.
- 970 Hansen, S.T., Meera, P., Otis, T.S., and Pulst, S.M. (2013). Changes in Purkinje cell firing and  
971 gene expression precede behavioral pathology in a mouse model of SCA2. *Hum. Mol.*  
972 *Genet.* 22, 271–283.
- 973 Häusser, M., and Clark, B.A. (1997). Tonic synaptic inhibition modulates neuronal output  
974 pattern and spatiotemporal synaptic integration. *Neuron* 19, 665–678.
- 975 He, Q., Duguid, I., Clark, B., Panzanelli, P., Patel, B., Thomas, P., Fritschy, J.-M., and Smart,  
976 T.G. (2015). Interneuron- and GABAA receptor-specific inhibitory synaptic plasticity in  
977 cerebellar Purkinje cells. *Nat. Commun.* 6, 7364.
- 978 Hisano, S., Sawada, K., Kawano, M., Kanemoto, M., Xiong, G., Mogi, K., Sakata-Haga, H.,

- 979 Takeda, J., Fukui, Y., and Nogami, H. (2002). Expression of inorganic  
980 phosphate/vesicular glutamate transporters (BNPI/VGLUT1 and DNPI/VGLUT2) in the  
981 cerebellum and precerebellar nuclei of the rat. *Mol. Brain Res.* *107*, 23–31.
- 982 Holt, G.R., Softky, W.R., Koch, C., and Douglas, R.J. (1996). Comparison of discharge  
983 variability in vitro and in vivo in cat visual cortex neurons. *J. Neurophysiol.* *75*, 1806–  
984 1814.
- 985 Hoshino, M., Nakamura, S., Mori, K., Kawauchi, T., Terao, M., Nishimura, Y. V, Fukuda, A.,  
986 Fuse, T., Matsuo, N., Sone, M., et al. (2005). Ptf1a, a bHLH transcriptional gene, defines  
987 GABAergic neuronal fates in cerebellum. *Neuron* *47*, 201–213.
- 988 Houck, B.D., and Person, A.L. (2015). Cerebellar Premotor Output Neurons Collateralize to  
989 Innervate the Cerebellar Cortex. *J. Comp. Neurol.* *523*, 2254–2271.
- 990 Hull, C., and Regehr, W.G. (2012). Identification of an inhibitory circuit that regulates cerebellar  
991 Golgi cell activity. *Neuron* *73*, 149–158.
- 992 Ino, H. (2004). Immunohistochemical characterization of the orphan nuclear receptor ROR alpha  
993 in the mouse nervous system. *J. Histochem. Cytochem.* *52*, 311–323.
- 994 Kim, E.J., Battiste, J., Nakagawa, Y., and Johnson, J.E. (2008). Ascl1 (Mash1) lineage cells  
995 contribute to discrete cell populations in CNS architecture. *Mol. Cell. Neurosci.* *38*, 595–  
996 606.
- 997 Konnerth, A., Llano, I., and Armstrong, C.M. (1990). Synaptic currents in cerebellar Purkinje  
998 cells. *Proc. Natl. Acad. Sci. U. S. A.* *87*, 2662–2665.
- 999 Lang, E.J., Tang, T., Suh, C.Y., Xiao, J., Kotsurovskyy, Y., Blenkinsop, T.A., Marshall, S.P.,



- 1000 and Sugihara, I. (2014). Modulation of Purkinje cell complex spike waveform by  
1001 synchrony levels in the olivocerebellar system. *Front. Syst. Neurosci.* 8, 210.
- 1002 Lang, E.J., Apps, R., Bengtsson, F., Cerminara, N.L., De Zeeuw, C.I., Ebner, T.J., Heck, D.H.,  
1003 Jaeger, D., Jörntell, H., Kawato, M., et al. (2017). The Roles of the Olivocerebellar  
1004 Pathway in Motor Learning and Motor Control. A Consensus Paper. *Cerebellum* 16,  
1005 230–252.
- 1006 Leto, K., Bartolini, A., Yanagawa, Y., Obata, K., Magrassi, L., Schilling, K., and Rossi, F.  
1007 (2009). Laminar fate and phenotype specification of cerebellar GABAergic interneurons.  
1008 *J. Neurosci.* 29, 7079–7091.
- 1009 Luján, R., Albasanz, J.L., Shigemoto, R., and Juiz, J.M. (2005). Preferential localization of the  
1010 hyperpolarization-activated cyclic nucleotide-gated cation channel subunit HCN1 in  
1011 basket cell terminals of the rat cerebellum. *Eur. J. Neurosci.* 21, 2073–2082.
- 1012 Machold, R., and Fishell, G. (2005). Math1 is expressed in temporally discrete pools of  
1013 cerebellar rhombic-lip neural progenitors. *Neuron* 48, 17–24.
- 1014 Mann-Metzer, P., and Yarom, Y. (1999). Electrotonic coupling interacts with intrinsic properties  
1015 to generate synchronized activity in cerebellar networks of inhibitory interneurons. *J.*  
1016 *Neurosci.* 19, 3298–3306.
- 1017 Manto, M., Bower, J.M., Conforto, A.B., Delgado-García, J.M., da Guarda, S.N.F., Gerwig, M.,  
1018 Habas, C., Hagura, N., Ivry, R.B., Mariën, P., et al. (2012). Consensus Paper: Roles of  
1019 the Cerebellum in Motor Control—The Diversity of Ideas on Cerebellar Involvement in  
1020 Movement. *The Cerebellum* 11, 457–487.
- 1021 Maricich, S.M., and Herrup, K. (1999). Pax-2 expression defines a subset of GABAergic

- 1022 interneurons and their precursors in the developing murine cerebellum. *J. Neurobiol.* *41*,  
1023 281–294.
- 1024 McFarland, R., Blokhin, A., Sydnor, J., Mariani, J., and Vogel, M.W. (2007). Oxidative stress,  
1025 nitric oxide, and the mechanisms of cell death in Lurcher Purkinje cells. *Dev. Neurobiol.*  
1026 *67*, 1032–1046.
- 1027 Mugnaini, E., Sekerková, G., and Martina, M. (2011). The unipolar brush cell: a remarkable  
1028 neuron finally receiving deserved attention. *Brain Res. Rev.* *66*, 220–245.
- 1029 Orduz, D., and Llano, I. (2007). Recurrent axon collaterals underlie facilitating synapses between  
1030 cerebellar Purkinje cells. *Proc. Natl. Acad. Sci. U. S. A.* *104*, 17831–17836.
- 1031 Orduz, D., Boom, A., Gall, D., Brion, J.-P., Schiffmann, S.N., and Schwaller, B. (2014).  
1032 Subcellular structural plasticity caused by the absence of the fast Ca(2+) buffer calbindin  
1033 D-28k in recurrent collaterals of cerebellar Purkinje neurons. *Front. Cell. Neurosci.* *8*,  
1034 364.
- 1035 Palay, S.L., and Chan-Palay, V. (1974). *Cerebellar Cortex* (Berlin, Heidelberg: Springer Berlin  
1036 Heidelberg).
- 1037 Palkovits, M., Magyar, P., and Szentágothai, J. (1971). Quantitative histological analysis of the  
1038 cerebellar cortex in the cat. 3. Structural organization of the molecular layer. *Brain Res.*  
1039 *34*, 1–18.
- 1040 Pouzat, C., and Hestrin, S. (1997). Developmental Regulation of Basket/Stellate Cellright-  
1041 arrowPurkinje Cell Synapses in the Cerebellum. *J. Neurosci.* *17*, 9104–9112.
- 1042 Ramón y Cajal, S. (1909). *Histologie du système nerveux de l’homme* (Paris :).

- 1043 Reeber, S.L., Gebre, S. a, and Sillitoe, R. V (2011). Fluorescence mapping of afferent  
1044 topography in three dimensions. *Brain Struct. Funct.* 216, 159–169.
- 1045 Reeber, S.L., Loeschel, C.A., Franklin, A., and Sillitoe, R. V (2013). Establishment of  
1046 topographic circuit zones in the cerebellum of scrambler mutant mice. *Front. Neural*  
1047 *Circuits* 7, 122.
- 1048 Rieubland, S., Roth, A., and Häusser, M. (2014). Structured connectivity in cerebellar inhibitory  
1049 networks. *Neuron* 81, 913–929.
- 1050 Sassoè-Pognetto, M., Giustetto, M., Panzanelli, P., Cantino, D., Kirsch, J., and Fritschy, J.M.  
1051 (1999). Postsynaptic colocalization of gephyrin and GABAA receptors. *Ann. N. Y. Acad.*  
1052 *Sci.* 868, 693–696.
- 1053 Sauerbrei, B.A., Lubenov, E.V., and Siapas, A.G. (2015). Structured Variability in Purkinje Cell  
1054 Activity during Locomotion. *Neuron* 87, 840–852.
- 1055 Sawada, K., Kalam Azad, A., Sakata-Haga, H., Lee, N.-S., Jeong, Y.-G., and Fukui, Y. (2009).  
1056 Striking pattern of Purkinje cell loss in cerebellum of an ataxic mutant mouse, tottering.  
1057 *Acta Neurobiol. Exp. (Wars).* 69, 138–145.
- 1058 Schilling, K., and Oberdick, J. (2009). The Treasury of the Commons: Making Use of Public  
1059 Gene Expression Resources to Better Characterize the Molecular Diversity of Inhibitory  
1060 Interneurons in the Cerebellar Cortex. *The Cerebellum* 8, 477–489.
- 1061 Schindelin, J., Arganda-Carreras, I., Frise, E., Kaynig, V., Longair, M., Pietzsch, T., Preibisch,  
1062 S., Rueden, C., Saalfeld, S., Schmid, B., et al. (2012). Fiji: an open-source platform for  
1063 biological-image analysis. *Nat. Methods* 9, 676–682.

- 1064 Sergaki, M.C., López-Ramos, J.C., Stagkourakis, S., Gruart, A., Broberger, C., Delgado-García,  
1065 J.M., and Ibáñez, C.F. (2017). Compromised Survival of Cerebellar Molecular Layer  
1066 Interneurons Lacking GDNF Receptors GFR $\alpha$ 1 or RET Impairs Normal Cerebellar  
1067 Motor Learning. *Cell Rep.* *19*, 1977–1986.
- 1068 Sillitoe, R. V, and Hawkes, R. (2002). Whole-mount immunohistochemistry: a high-throughput  
1069 screen for patterning defects in the mouse cerebellum. *J. Histochem. Cytochem.* *50*, 235–  
1070 244.
- 1071 Sillitoe, R. V, Benson, M.A., Blake, D.J., and Hawkes, R. (2003). Abnormal dysbindin  
1072 expression in cerebellar mossy fiber synapses in the mdx mouse model of Duchenne  
1073 muscular dystrophy. *J. Neurosci.* *23*, 6576–6585.
- 1074 Sillitoe, R. V, Stephen, D., Lao, Z., and Joyner, A.L. (2008a). Engrailed homeobox genes  
1075 determine the organization of Purkinje cell sagittal stripe gene expression in the adult  
1076 cerebellum. *J. Neurosci.* *28*, 12150–12162.
- 1077 Sillitoe, R. V, Gopal, N., and Joyner, A.L. (2009). Embryonic origins of ZebrinII parasagittal  
1078 stripes and establishment of topographic Purkinje cell projections. *Neuroscience* *162*,  
1079 574–588.
- 1080 Sillitoe, R. V, Vogel, M.W., and Joyner, A.L. (2010). Engrailed homeobox genes regulate  
1081 establishment of the cerebellar afferent circuit map. *J. Neurosci.* *30*, 10015–10024.
- 1082 Sillitoe, R. V., Chung, S.-H., Fritschy, J.-M., Hoy, M., and Hawkes, R. (2008b). Golgi cell  
1083 dendrites are restricted by Purkinje cell stripe boundaries in the adult mouse cerebellar  
1084 cortex. *J. Neurosci.* *28*, 2820–2826.
- 1085 Singec, I., Knoth, R., Ditter, M., Frotscher, M., and Volk, B. (2003). Neurogranin expression by

- 1086 cerebellar neurons in rodents and non-human primates. *J. Comp. Neurol.* *459*, 278–289.
- 1087 Slemmer, J.E., De Zeeuw, C.I., and Weber, J.T. (2005). Don't get too excited: mechanisms of  
1088 glutamate-mediated Purkinje cell death. In *Progress in Brain Research*, pp. 367–390.
- 1089 Sotelo, C. (2008). Development of “Pinceaux” formations and dendritic translocation of  
1090 climbing fibers during the acquisition of the balance between glutamatergic and  $\gamma$ -  
1091 aminobutyric acid inputs in developing Purkinje cells. *J. Comp. Neurol.* *506*, 240–  
1092 262.
- 1093 Srinivas, S., Watanabe, T., Lin, C.-S., Williams, C., Tanabe, Y., Jessell, T., and Costantini, F.  
1094 (2001). Cre reporter strains produced by targeted insertion of EYFP and ECFP into the  
1095 ROSA26 locus. *BMC Dev. Biol.* *1*, 4.
- 1096 Stichel, C.C., Kägi, U., and Heizmann, C.W. (1986). Parvalbumin in cat brain: isolation,  
1097 characterization, and localization. *J. Neurochem.* *47*, 46–53.
- 1098 Sudarov, A., Turnbull, R.K., Kim, E.J., Lebel-Potter, M., Guillemot, F., and Joyner, A.L. (2011).  
1099 *Ascl1* Genetics Reveals Insights into Cerebellum Local Circuit Assembly. *J. Neurosci.*  
1100 *31*, 11055–11069.
- 1101 Sugihara, I., Fujita, H., Na, J., Quy, P.N., Li, B.-Y., and Ikeda, D. (2009). Projection of  
1102 reconstructed single Purkinje cell axons in relation to the cortical and nuclear aldolase C  
1103 compartments of the rat cerebellum. *J. Comp. Neurol.* *512*, 282–304.
- 1104 Sultan, F., and Bower, J.M. (1998). Quantitative Golgi study of the rat cerebellar molecular layer  
1105 interneurons using principal component analysis. *J. Comp. Neurol.* *393*, 353–373.
- 1106 Tong, Q., Ye, C.-P., Jones, J.E., Elmquist, J.K., and Lowell, B.B. (2008). Synaptic release of

- 1107 GABA by AgRP neurons is required for normal regulation of energy balance. *Nat.*  
1108 *Neurosci.* *11*, 998–1000.
- 1109 Voogd, J. (2014). What we do not know about cerebellar systems neuroscience. *Front. Syst.*  
1110 *Neurosci.* *8*, 227.
- 1111 Voogd, J., and Glickstein, M. (1998). The anatomy of the cerebellum. *Trends Neurosci.* *21*, 370–  
1112 375.
- 1113 Wang, V.Y., Rose, M.F., and Zoghbi, H.Y. (2005). *Math1* expression redefines the rhombic lip  
1114 derivatives and reveals novel lineages within the brainstem and cerebellum. *Neuron* *48*,  
1115 31–43.
- 1116 Watt, A.J., Cuntz, H., Mori, M., Nusser, Z., Sjöström, P.J., and Häusser, M. (2009). Traveling  
1117 waves in developing cerebellar cortex mediated by asymmetrical Purkinje cell  
1118 connectivity. *Nat. Neurosci.* *12*, 463–473.
- 1119 Wefers, A.K., Haberlandt, C., Tekin, N.B., Fedorov, D.A., Timmermann, A., van der Want,  
1120 J.J.L., Chaudhry, F.A., Steinhäuser, C., Schilling, K., and Jabs, R. (2017). Synaptic input  
1121 as a directional cue for migrating interneuron precursors. *Development* *144*, 4125–4136.
- 1122 Weisheit, G., Gliem, M., Endl, E., Pfeffer, P.L., Busslinger, M., and Schilling, K. (2006).  
1123 Postnatal development of the murine cerebellar cortex: formation and early dispersal of  
1124 basket, stellate and Golgi neurons. *Eur. J. Neurosci.* *24*, 466–478.
- 1125 Welsh, J.P., Lang, E.J., Sugihara, I., and Llinás, R. (1995). Dynamic organization of motor  
1126 control within the olivocerebellar system. *Nature* *374*, 453–457.
- 1127 White, J.J., and Sillitoe, R. V (2013a). Postnatal development of cerebellar zones revealed by

- 1128 neurofilament heavy chain protein expression. *Front. Neuroanat.* 7, 9.
- 1129 White, J.J., and Sillitoe, R. V. (2013b). Development of the cerebellum: from gene expression  
1130 patterns to circuit maps. *Wiley Interdiscip. Rev. Dev. Biol.* 2, 149–164.
- 1131 White, J.J., and Sillitoe, R. V. (2017). Genetic silencing of olivocerebellar synapses causes  
1132 dystonia-like behavior in mice. *Nat. Commun.*
- 1133 White, J.J., Arancillo, M., Stay, T.L., George-Jones, N.A., Levy, S.L., Heck, D.H., and Sillitoe,  
1134 R. V. (2014). Cerebellar Zonal Patterning Relies on Purkinje Cell Neurotransmission. *J.*  
1135 *Neurosci.* 34, 8231–8245.
- 1136 White, J.J., Lin, T., Brown, A.M., Arancillo, M., Lackey, E.P., Stay, T.L., and Sillitoe, R. V.  
1137 (2016a). An optimized surgical approach for obtaining stable extracellular single-unit  
1138 recordings from the cerebellum of head-fixed behaving mice. *J. Neurosci. Methods* 262,  
1139 21–31.
- 1140 White, J.J., Arancillo, M., King, A., Lin, T., Miterko, L.N., Gebre, S.A., and Sillitoe, R. V.  
1141 (2016b). Pathogenesis of severe ataxia and tremor without the typical signs of  
1142 neurodegeneration. *Neurobiol. Dis.* 86, 86–98.
- 1143 Witter, L., Rudolph, S., Pressler, R.T., Lahlaf, S.I., and Regehr, W.G. (2016). Purkinje Cell  
1144 Collaterals Enable Output Signals from the Cerebellar Cortex to Feed Back to Purkinje  
1145 Cells and Interneurons. *Neuron* 91, 312–319.
- 1146 Wojcik, S.M., Katsurabayashi, S., Guillemin, I., Friauf, E., Rosenmund, C., Brose, N., and Rhee,  
1147 J.-S. (2006). A shared vesicular carrier allows synaptic corelease of GABA and glycine.  
1148 *Neuron* 50, 575–587.

- 1149 Wulff, P., Schonewille, M., Renzi, M., Viltono, L., Sassoè-Pognetto, M., Badura, A., Gao, Z.,  
1150 Hoebeek, F.E., van Dorp, S., Wisden, W., et al. (2009). Synaptic inhibition of Purkinje  
1151 cells mediates consolidation of vestibulo-cerebellar motor learning. *Nat. Neurosci.* *12*,  
1152 1042–1049.
- 1153 Xiao, J., Cerminara, N.L., Kotsurovskyy, Y., Aoki, H., Burroughs, A., Wise, A.K., Luo, Y.,  
1154 Marshall, S.P., Sugihara, I., Apps, R., et al. (2014). Systematic Regional Variations in  
1155 Purkinje Cell Spiking Patterns. *PLoS One* *9*, e105633.
- 1156 Zervas, M., Millet, S., Ahn, S., and Joyner, A.L. (2004). Cell behaviors and genetic lineages of  
1157 the mesencephalon and rhombomere 1. *Neuron* *43*, 345–357.
- 1158 Zhang, L., and Goldman, J.E. (1996). Generation of Cerebellar Interneurons from Dividing  
1159 Progenitors in White Matter. *Neuron* *16*, 47–54.
- 1160 Zhou, H., Lin, Z., Voges, K., Ju, C., Gao, Z., Bosman, L.W.J., Ruigrok, T.J.H., Hoebeek, F.E.,  
1161 De Zeeuw, C.I., and Schonewille, M. (2014). Cerebellar modules operate at different  
1162 frequencies. *Elife* *3*, e02536.
- 1163
- 1164



1165 **Conflicts of Interest**

1166

1167 The authors declare no conflicts of interest.

1168 **Acknowledgments**

1169 This work was supported by funds from Baylor College of Medicine and Texas Children's  
1170 Hospital. RVS also received support from the Bachmann-Strauss Dystonia and Parkinson  
1171 Foundation, Inc., Mrs. Clifford Elder White Graham Endowed Research Fund, the Hamill  
1172 Foundation, the Caroline Wiess Law Fund for Research in Molecular Medicine, a BCM IDDRC  
1173 Project Development Award, BCM IDDRC Grant U54HD083092 from the Eunice Kennedy  
1174 Shriver National Institute of Child Health and Human Development (The IDDRC  
1175 Neuropathology Sub-Core contributed to the tissue staining experiments), Grant C06RR029965  
1176 from the National Center for Research Resources, and by the National Institutes of Neurological  
1177 Disorders and Stroke (NINDS) R01NS089664 and R01NS100874. JJW received supported from  
1178 F31NS092264, TLS from F31NS095491, MA by a postdoctoral award from the National Ataxia  
1179 Foundation (NAF), and AMB from F31NS101891. The content is solely the responsibility of the  
1180 authors and does not necessarily represent the official views of the National Center for Research  
1181 Resources or the National Institutes of Health.

1182

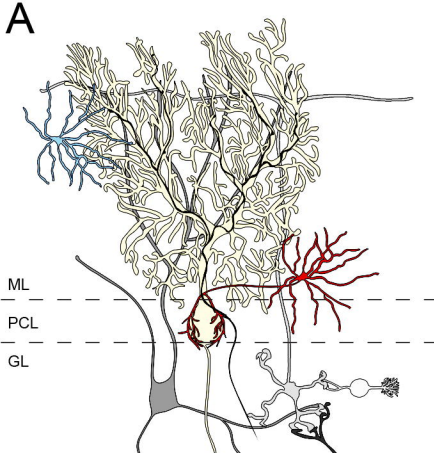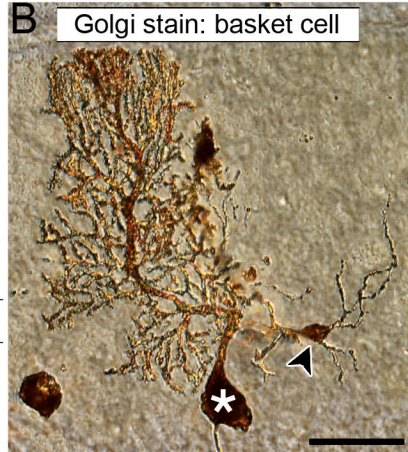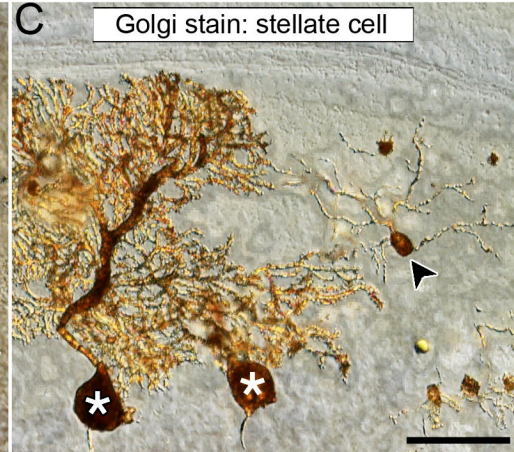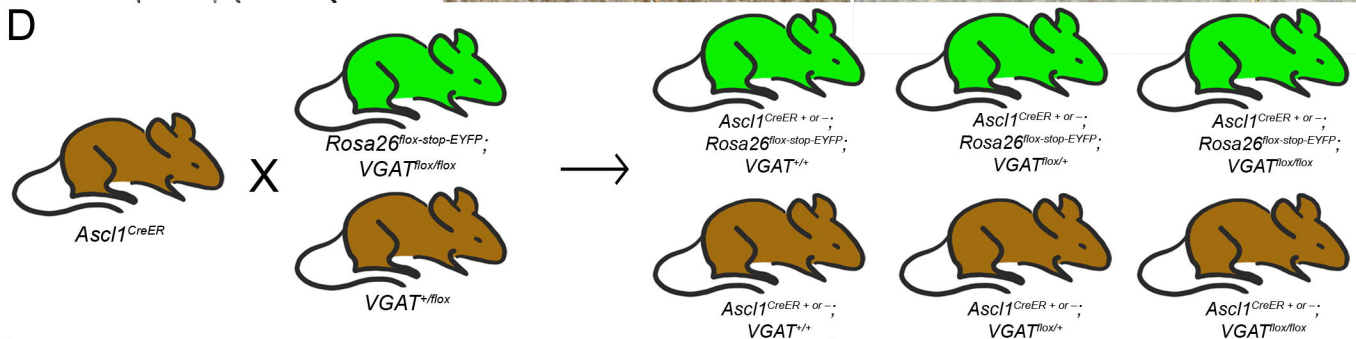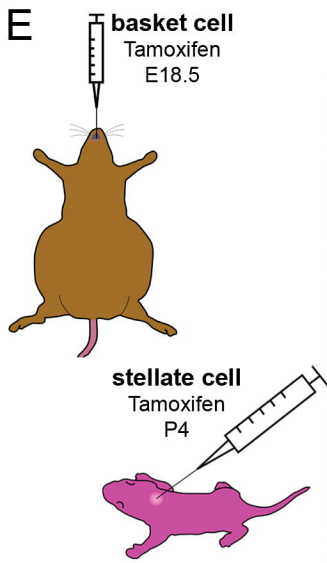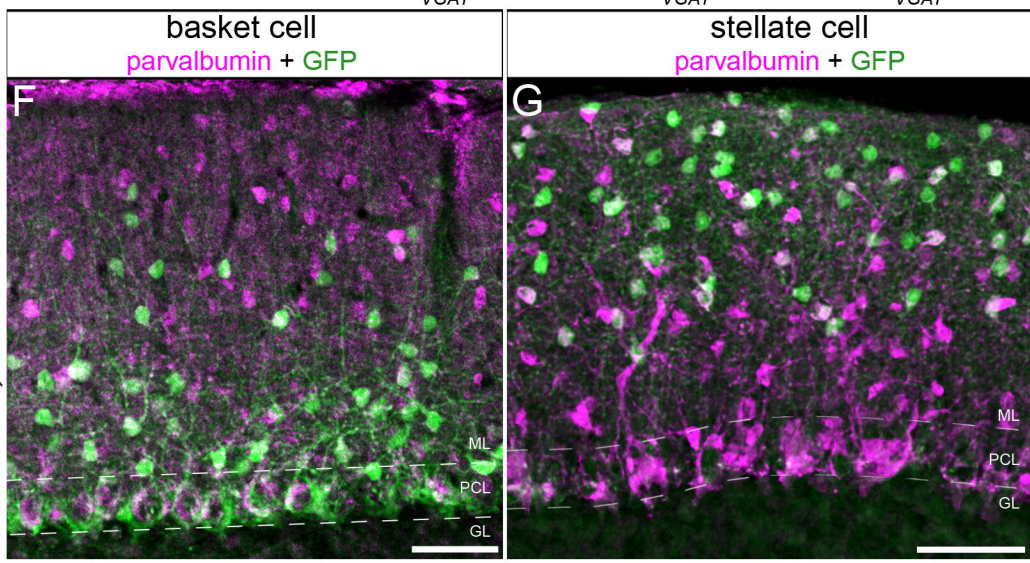

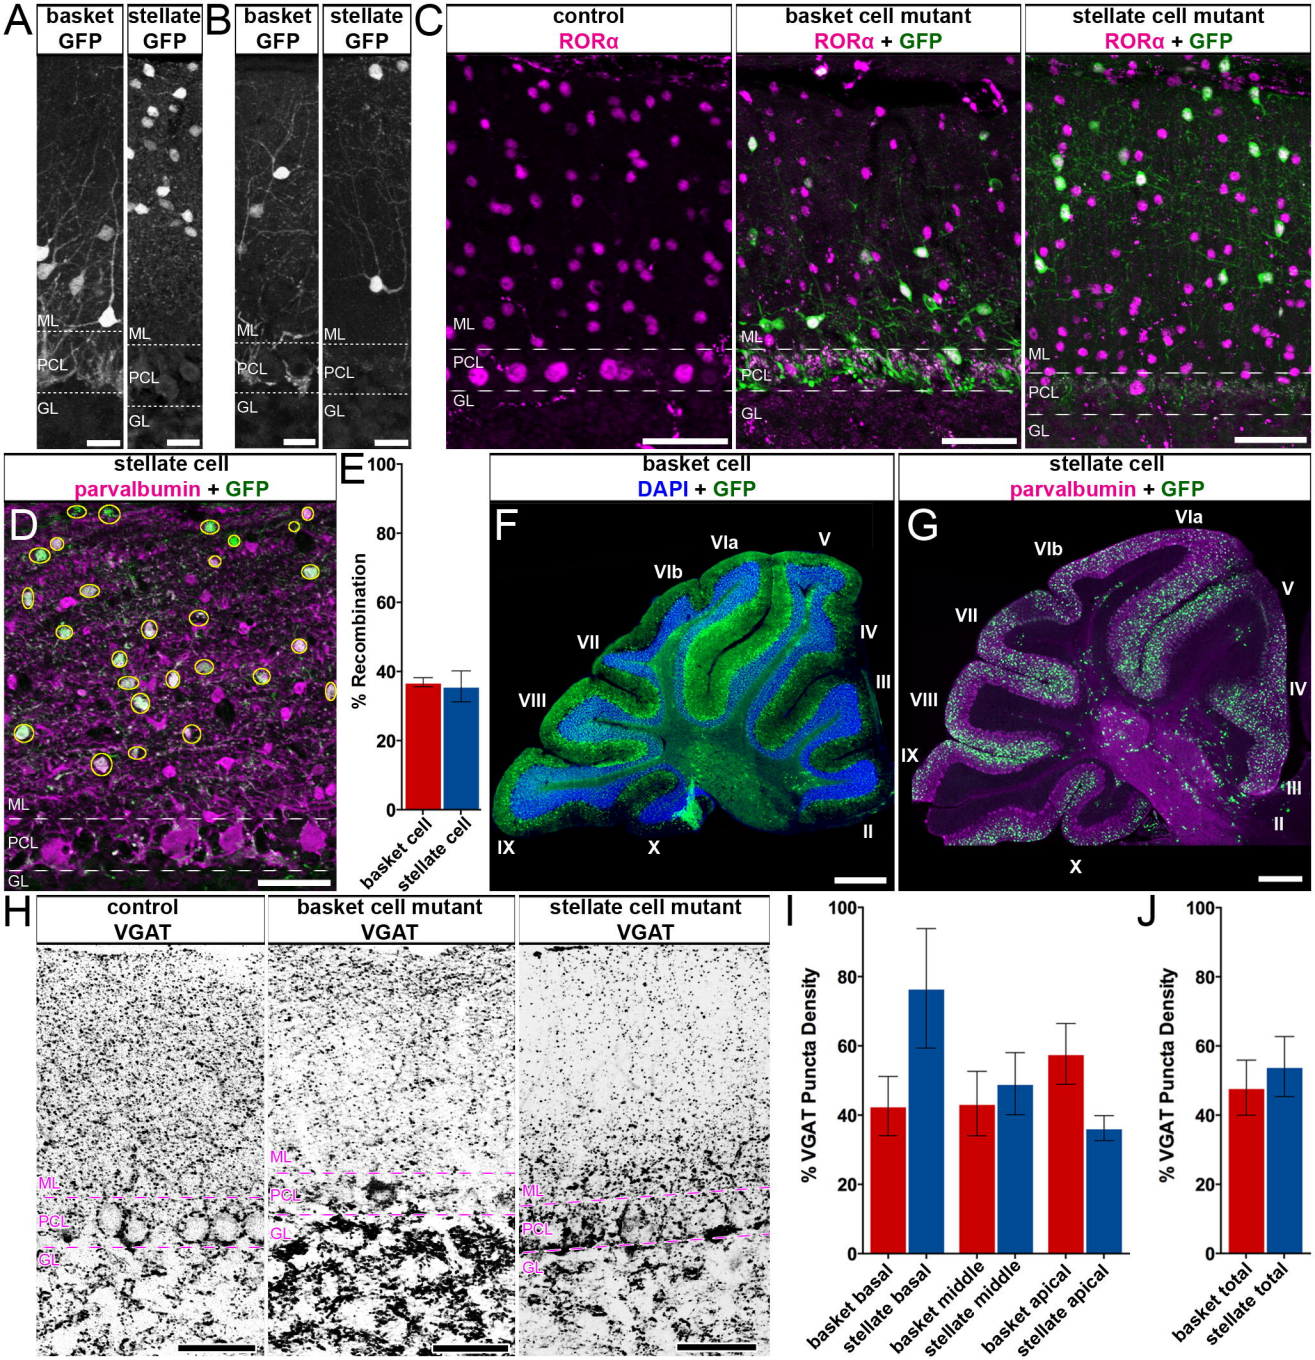

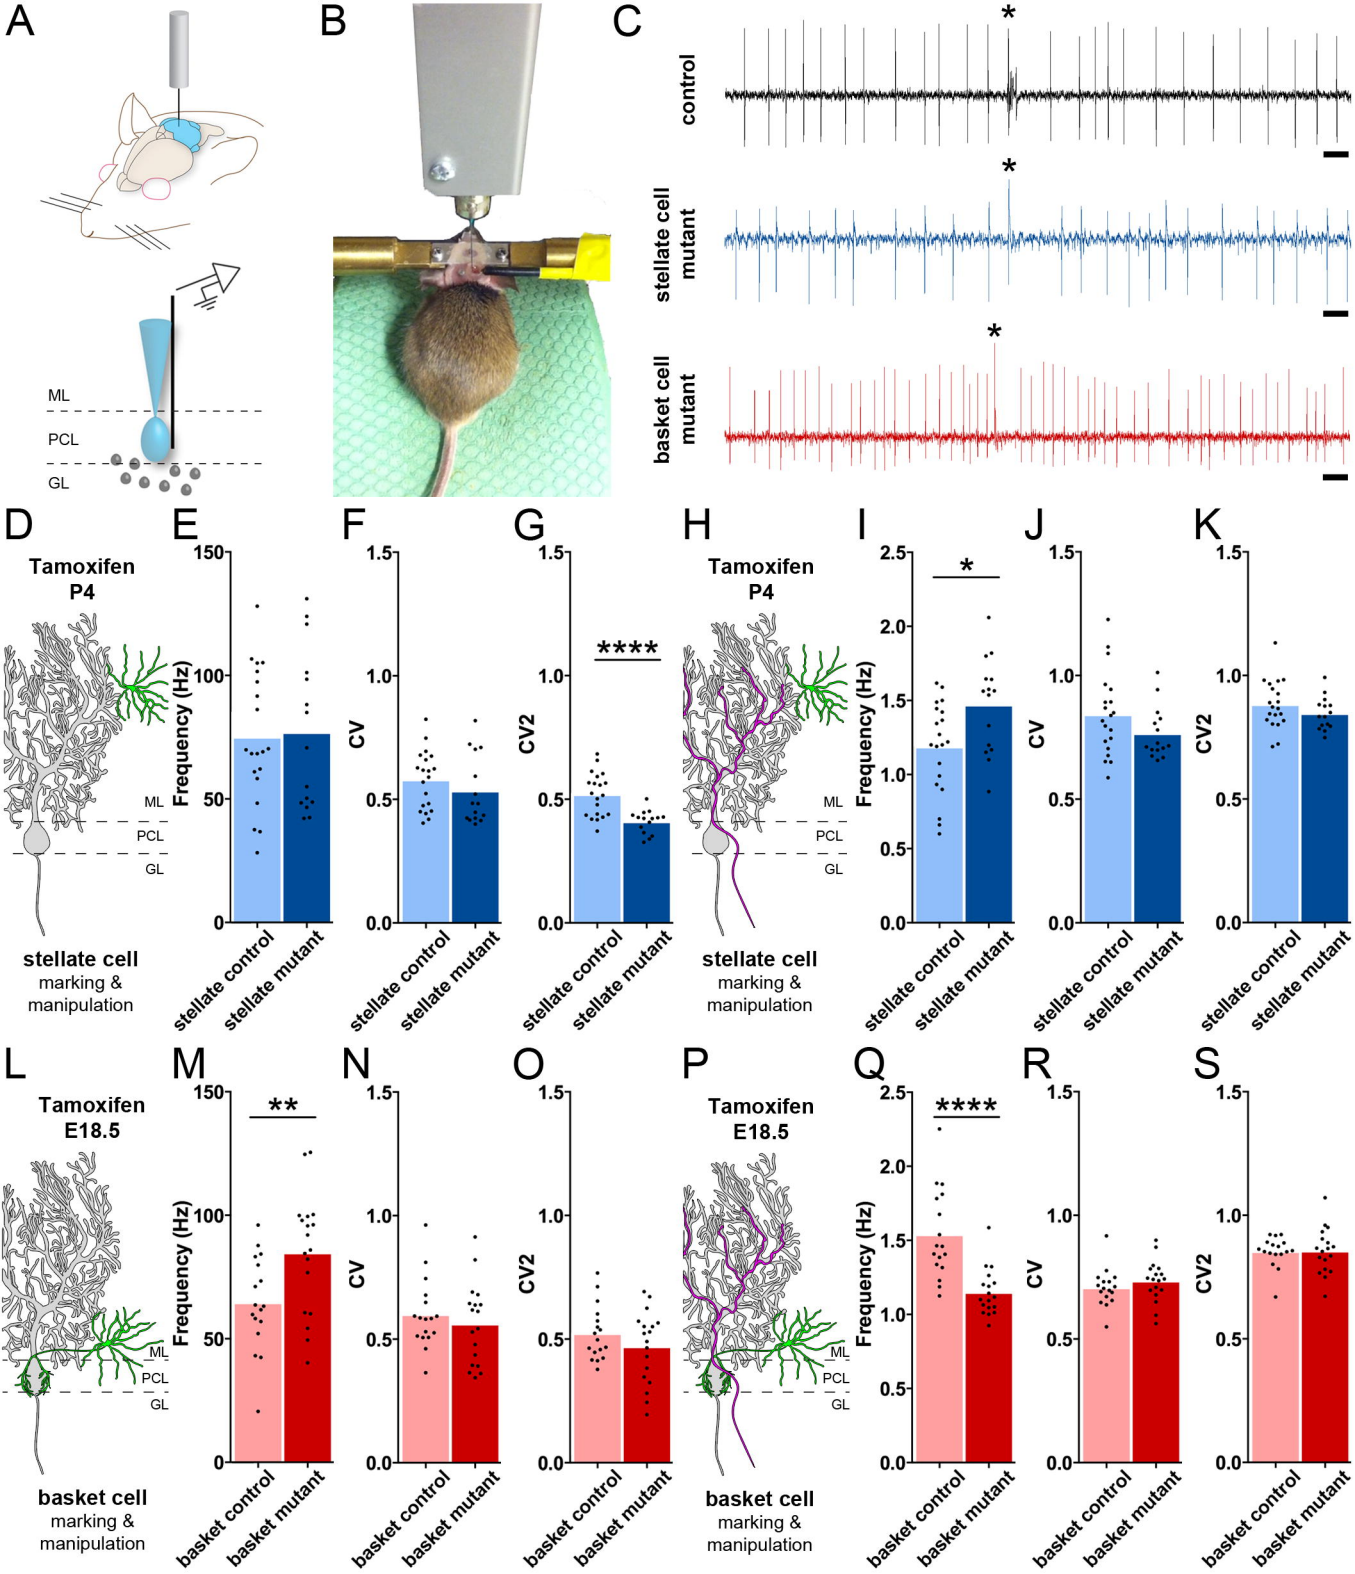

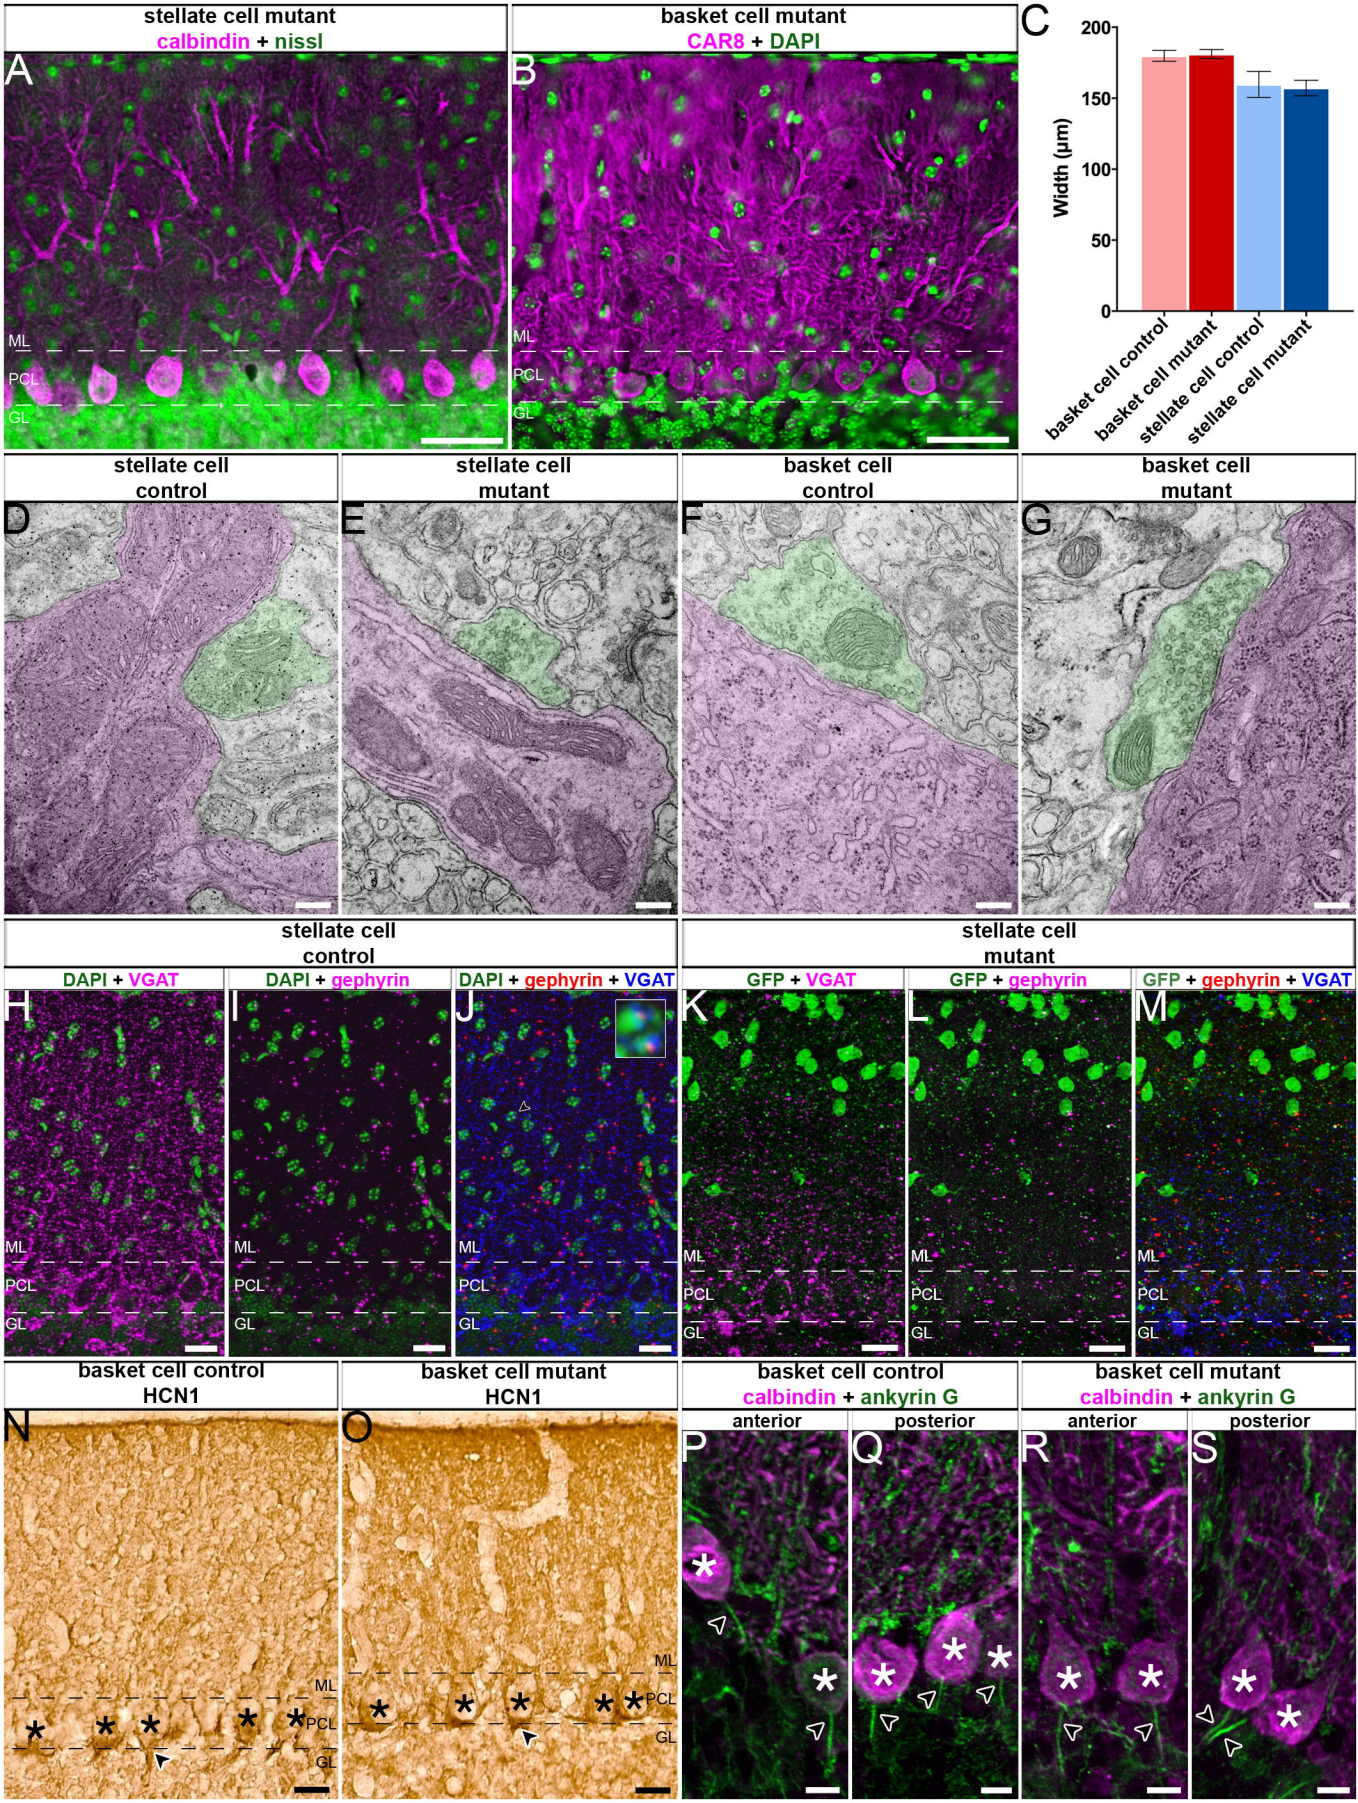

**CAR8 / IP3R1 (Purkinje cells)**

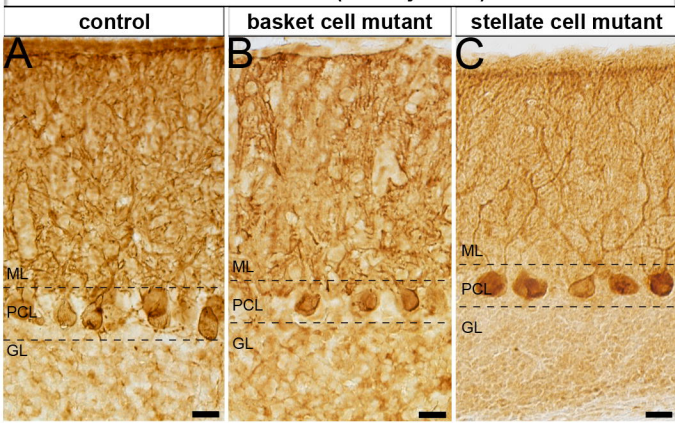

**GABA $\alpha$ 6 (granule cells)**

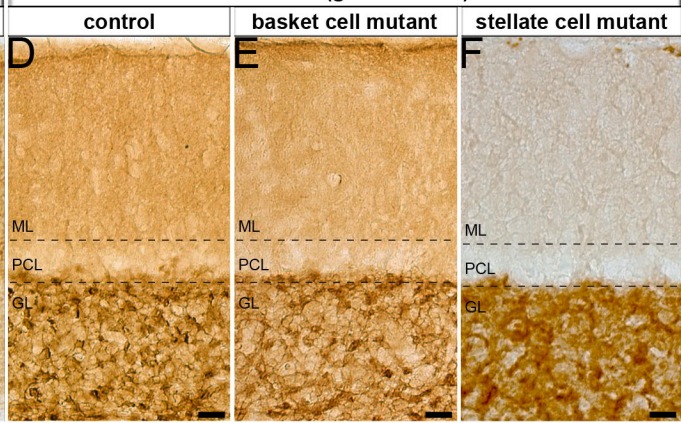

**NFH (Purkinje and basket cells)**

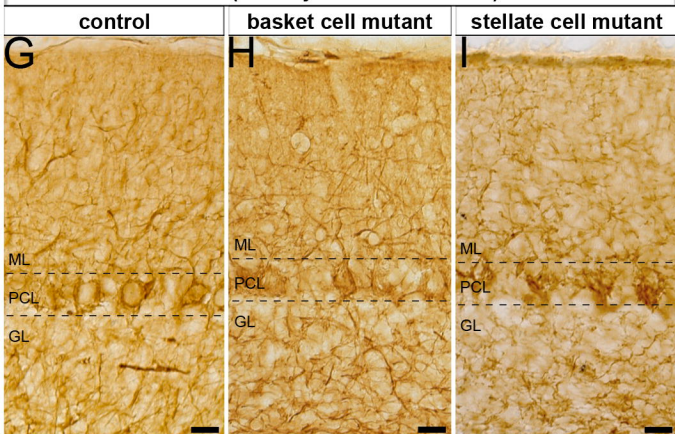

**neurogranin (Golgi cells)**

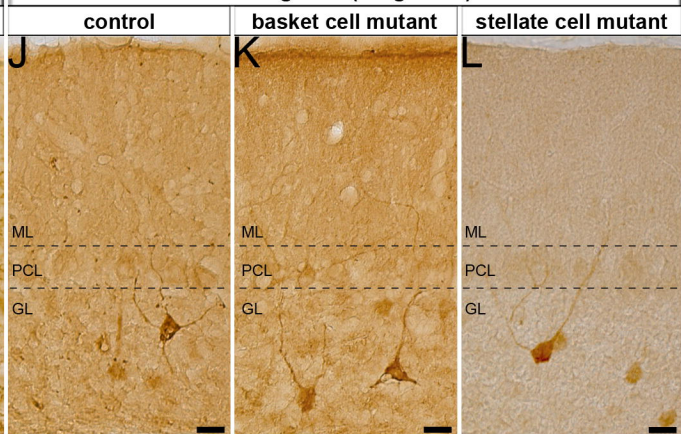

**VGLUT1 (mossy and parallel fibers)**

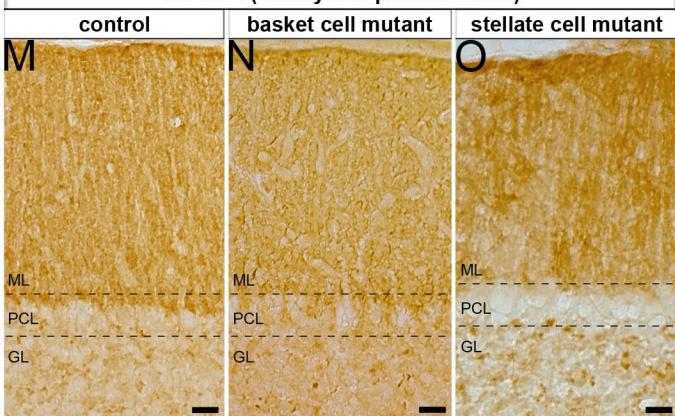

**VGLUT2 (mossy and climbing fibers)**

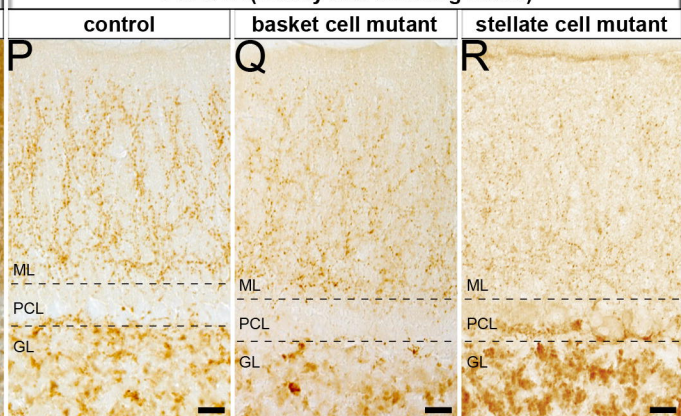

**calretinin (unipolar brush cells)**

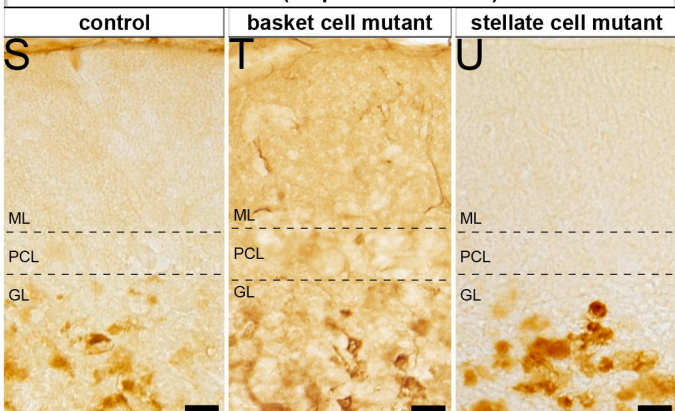

**CART (climbing fibers)**

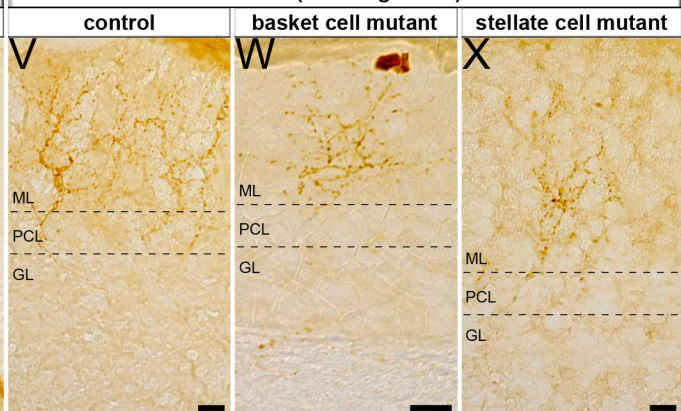

basket cell: GFP + Nissl

A

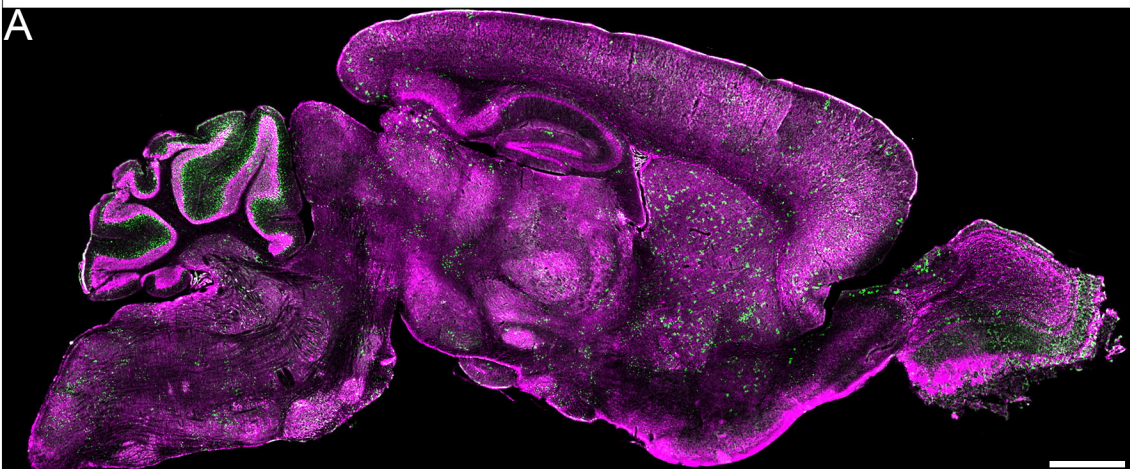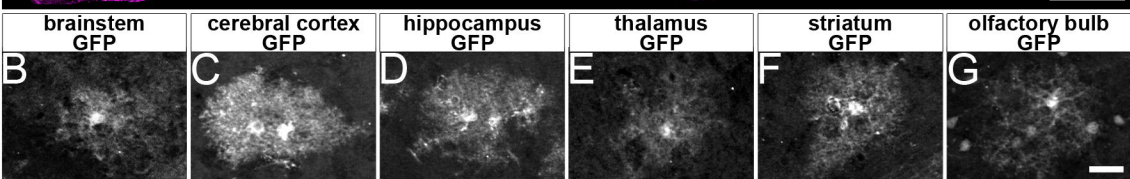

stellate cell: GFP + NeuN

H

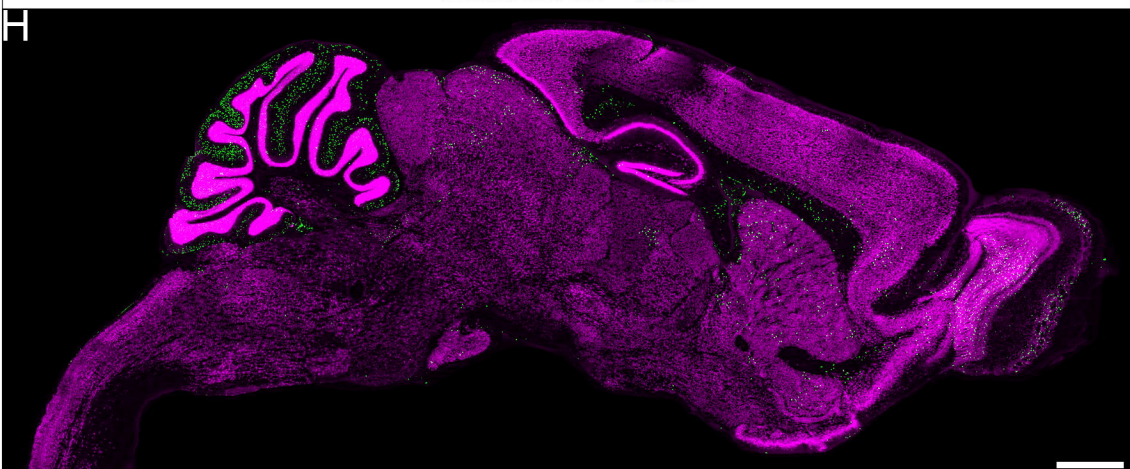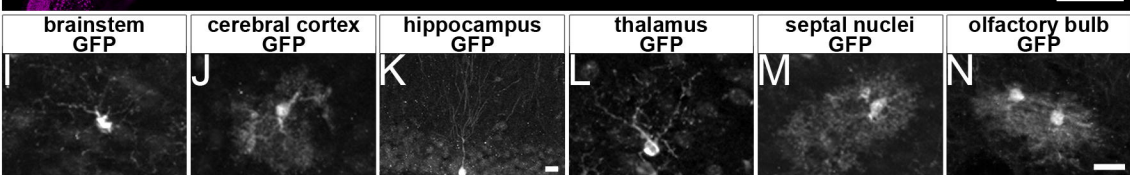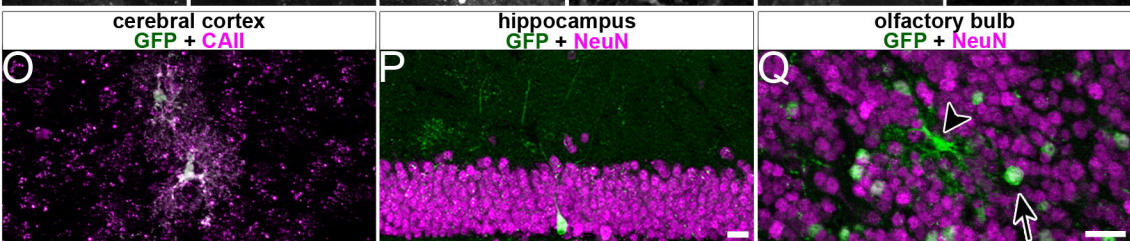

Source: http://biorxiv.org/content/10.1101/376517v1.full.pdf
